# Supplementary material
Source: Research Square preprint supplement (doi:10.21203/rs.3.rs-9587147/v1)
Supplement: Supplementary file 1 [file bd3af5e0f18fbd2dd3162f55.docx]

**Supplementary Table S1: Complete enamel protein pool identified across HSPM and MIH (total inventory; n = 435 proteins)**

| **Total Protein Pool — All proteins identified across MIH & HSPM groups (n=435)** | | | |
| --- | --- | --- | --- |
| **UniProt Accession** | **Gene Symbol** | **Protein Description** | **MW [kDa]** |
| A0A075B6I9 | IGLV7-46 | Immunoglobulin lambda variable 7-46 GN= | 12.5 |
| A0A075B6K4 | IGLV3-10 | Immunoglobulin lambda variable 3-10 | 12.4 |
| A0A075B6R9 | IGKV2D-24 | Probable non-functional immunoglobulin kappa variable 2D-24 | 13.1 |
| A0A075B6S5 | IGKV1-27 | Immunoglobulin kappa variable 1-27 | 12.7 |
| A0A087WW87 | IGKV2-40 | Immunoglobulin kappa variable 2-40 | 13.3 |
| A0A0A0MRZ8 | IGKV3D-11 | Immunoglobulin kappa variable 3D-11 | 12.6 |
| A0A0A0MS15 | IGHV3-49 | Immunoglobulin heavy variable 3-49 | 13 |
| A0A0B4J1V0 | IGHV3-15 | Immunoglobulin heavy variable 3-15 | 12.9 |
| A0A0B4J1X5 | IGHV3-74 | Immunoglobulin heavy variable 3-74 | 12.8 |
| A0A0B4J2D9 | IGKV1D-13 | Immunoglobulin kappa variable 1D-13 | 12.6 |
| A0A0C4DH29 | IGHV1-3 | Immunoglobulin heavy variable 1-3 | 13 |
| A0A0C4DH72 | IGKV1-6 | Immunoglobulin kappa variable 1-6 | 12.7 |
| A0A0J9YXX1 | IGHV5-10-1 | Immunoglobulin heavy variable 5-10-1 | 12.8 |
| A5A3E0 | POTEF | POTE ankyrin domain family member F | 121.4 |
| A6NMY6 | ANXA2P2 | Putative annexin A2-like protein | 38.6 |
| A8MXQ7 | LOC642574 - IQANK1 | Putative IQ motif and ankyrin repeat domain-containing protein LOC642574 | 68.3 |
| B9A064 | IGLL5 | Immunoglobulin lambda-like polypeptide 5 | 23 |
| O00291 | HIP1 | Huntingtin-interacting protein 1 | 116.1 |
| O00584 | RNASET2 | Ribonuclease T2 | 29.5 |
| O14829 | PPEF1 | Serine/threonine-protein phosphatase with EF-hands 1 | 75.7 |
| O14974 | PPP1R12A | Protein phosphatase 1 regulatory subunit 12A | 115.2 |
| O15041 | SEMA3E | Semaphorin-3E | 89.2 |
| O15169 | AXIN1 | Axin-1 | 95.6 |
| O15240 | VGF | Neurosecretory protein VGF | 67.2 |
| O15335 | CHAD | Chondroadherin | 40.5 |
| O15355 | PPM1G | Protein phosphatase 1G | 59.2 |
| O43247 | TEX33 | Testis-expressed protein 33 | 30.7 |
| O43432 | EIF4G3 | Eukaryotic translation initiation factor 4 gamma 3 | 176.5 |
| O43497 | CACNA1G | Voltage-dependent T-type calcium channel subunit alpha-1G | 262.3 |
| O60437 | PPL | Periplakin | 204.6 |
| O60729 | CDC14B | Dual specificity protein phosphatase CDC14B | 56.8 |
| O60882 | MMP20 | Matrix metalloproteinase-20 | 54.4 |
| O60938 | KERA | Keratocan | 40.5 |
| O75367 | MACROH2A1 | Core histone macro-H2A.1 | 39.6 |
| O75533 | SF3B1 | Splicing factor 3B subunit 1 | 145.7 |
| O75594 | PGLYRP1 | Peptidoglycan recognition protein 1 | 21.7 |
| O95171 | SCEL | Sciellin | 77.5 |
| O95477 | ABCA1 | Phospholipid-transporting ATPase ABCA1 | 254.1 |
| O95487 | SEC24B | Protein transport protein Sec24B | 137.3 |
| O95613 | PCNT | Pericentrin | 377.8 |
| P00450 | CP | Ceruloplasmin | 122.1 |
| P00734 | F2 | Prothrombin | 70 |
| P00738 | HP | Haptoglobin | 45.2 |
| P00742 | F10 | Coagulation factor X | 54.7 |
| P00751 | CFB | Complement factor B | 85.5 |
| P01008 | SERPINC1 | Antithrombin-III | 52.6 |
| P01009 | SERPINA1 | Alpha-1-antitrypsin | 46.7 |
| P01011 | SERPINA3 | Alpha-1-antichymotrypsin | 47.6 |
| P01019 | AGT | Angiotensinogen | 53.1 |
| P01023 | A2M | Alpha-2-macroglobulin | 163.2 |
| P01024 | C3 | Complement C3 | 187 |
| P01033 | TIMP1 | Metalloproteinase inhibitor 1 | 23.2 |
| P01034 | CST3 | Cystatin-C | 15.8 |
| P01036 | CST4 | Cystatin-S | 16.2 |
| P01040 | CSTA | Cystatin-A | 11 |
| P01042 | KNG1 | Kininogen-1 | 71.9 |
| P01137 | TGFB1 | Transforming growth factor beta-1 proprotein | 44.3 |
| P01344 | IGF2 | Insulin-like growth factor II | 20.1 |
| P01591 | JCHAIN | Immunoglobulin J chain | 18.1 |
| P01593 | IGKV1D-33 | Immunoglobulin kappa variable 1D-33 | 12.8 |
| P01599 | IGKV1-17 | Immunoglobulin kappa variable 1-17 | 12.8 |
| P01619 | IGKV3-20 | Immunoglobulin kappa variable 3-20 | 12.5 |
| P01624 | IGKV3-15 | Immunoglobulin kappa variable 3-15 | 12.5 |
| P01700 | IGLV1-47 | Immunoglobulin lambda variable 1-47 | 12.3 |
| P01701 | IGLV1-51 | Immunoglobulin lambda variable 1-51 | 12.2 |
| P01703 | IGLV1-40 | Immunoglobulin lambda variable 1-40 | 12.3 |
| P01714 | IGLV3-19 | Immunoglobulin lambda variable 3-19 | 12 |
| P01718 | IGLV3-27 | Immunoglobulin lambda variable 3-27 | 12.2 |
| P01721 | IGLV6-57 | Immunoglobulin lambda variable 6-57 | 12.6 |
| P01742 | IGLV1-69 | Immunoglobulin heavy variable 1-69 | 12.7 |
| P01763 | IGLV3-48 | Immunoglobulin heavy variable 3-48 | 12.8 |
| P01768 | IGLV3-30 | Immunoglobulin heavy variable 3-30 | 12.9 |
| P01780 | IGLV3-7 | Immunoglobulin heavy variable 3-7 | 12.9 |
| P01833 | PIGR | Polymeric immunoglobulin receptor | 83.2 |
| P01834 | IGKC | Immunoglobulin kappa constant | 11.8 |
| P01857 | IGHG1 | Immunoglobulin heavy constant gamma 1 | 36.1 |
| P01859 | IGHG2 | Immunoglobulin heavy constant gamma 2 | 35.9 |
| P01860 | IGHG3 | Immunoglobulin heavy constant gamma 3 | 41.3 |
| P01861 | IGHG4 | Immunoglobulin heavy constant gamma 4 | 35.9 |
| P01871 | IGHM | Immunoglobulin heavy constant mu | 49.4 |
| P01876 | IGHA1 | Immunoglobulin heavy constant alpha 1 | 37.6 |
| P01877 | IGHA2 | Immunoglobulin heavy constant alpha 2 | 36.6 |
| P01889 | HLA-B | HLA class I histocompatibility antigen, B alpha chain | 40.4 |
| P02042 | HBD | Hemoglobin subunit delta | 16 |
| P02452 | COL1A1 | Collagen alpha-1(I) chain | 138.9 |
| P02533 | KRT14 | Keratin, type I cytoskeletal 14 | 51.5 |
| P02538 | KRT6A | Keratin, type II cytoskeletal 6A | 60 |
| P02545 | LMNA | Prelamin-A/C | 74.1 |
| P02647 | APOA1 | Apolipoprotein A-I | 30.8 |
| P02649 | APOE | Apolipoprotein E | 36.1 |
| P02652 | APOA2 | Apolipoprotein A-II | 11.2 |
| P02654 | APOC1 | Apolipoprotein C-I | 9.3 |
| P02656 | APOC3 | Apolipoprotein C-III | 10.8 |
| P02671 | FGA | Fibrinogen alpha chain | 94.9 |
| P02741 | CRP | C-reactive protein | 25 |
| P02743 | APCS | Serum amyloid P-component | 25.4 |
| P02748 | C9 | Complement component C9 | 63.1 |
| P02749 | APOH | Beta-2-glycoprotein 1 | 38.3 |
| P02753 | RBP4 | Retinol-binding protein 4 | 23 |
| P02760 | AMBP | Protein AMBP | 39 |
| P02763 | ORM1 | Alpha-1-acid glycoprotein 1 | 23.5 |
| P02765 | AHSG | Alpha-2-HS-glycoprotein | 39.3 |
| P02766 | TTR | Transthyretin | 15.9 |
| P02768 | ALB | Albumin | 69.3 |
| P02774 | GC | Vitamin D-binding protein | 52.9 |
| P02775 | PPBP | Platelet basic protein | 13.9 |
| P02787 | TF | Serotransferrin | 77 |
| P02788 | LTF | Lactotransferrin | 78.1 |
| P02790 | HPX | Hemopexin | 51.6 |
| P02808 | STATH | Statherin | 7.3 |
| P02814 | SMR3B | Submaxillary gland androgen-regulated protein 3B | 8.2 |
| P02818 | BGLAP | Osteocalcin | 11 |
| P03950 | ANG | Angiogenin | 16.5 |
| P03973 | SLPI | Antileukoproteinase | 14.3 |
| P04004 | VTN | Vitronectin | 54.3 |
| P04040 | CAT | Catalase | 59.7 |
| P04070 | PROC | Vitamin K-dependent protein C | 52 |
| P04075 | ALDOA | Fructose-bisphosphate aldolase A | 39.4 |
| P04083 | ANXA1 | Annexin A1 OS=Homo sapiens | 38.7 |
| P04085 | PDGFA | Platelet-derived growth factor subunit A | 24 |
| P04196 | HRG | Histidine-rich glycoprotein | 59.5 |
| P04217 | A1BG | Alpha-1B-glycoprotein | 54.2 |
| P04259 | KRT6B | Keratin, type II cytoskeletal 6B | 60 |
| P04264 | KRT1 | Keratin, type II cytoskeletal 1 | 66 |
| P04406 | GAPDH | Glyceraldehyde-3-phosphate dehydrogenase | 36 |
| P04430 | IGKV1-16 | Immunoglobulin kappa variable 1-16 | 12.6 |
| P04432 | IGKV1D-39 | Immunoglobulin kappa variable 1D-39 | 12.7 |
| P04745 | AMY1A | Alpha-amylase 1 | 57.7 |
| P04792 | HSPB1 | Heat shock protein beta-1 | 22.8 |
| P05019 | IGF1 | Insulin-like growth factor I | 21.8 |
| P05060 | CHGB | Secretogranin-1 | 78.2 |
| P05067 | APP | Amyloid-beta precursor protein | 86.9 |
| P05090 | APOD | Apolipoprotein D | 21.3 |
| P05109 | S100A8 | Protein S100-A8 | 10.8 |
| P05154 | SERPINA5 | Plasma serine protease inhibitor | 45.6 |
| P05155 | SERPING1 | Plasma protease C1 inhibitor | 55.1 |
| P05164 | MPO | Myeloperoxidase | 83.8 |
| P05546 | SERPIND1 | Heparin cofactor 2 | 57 |
| P05787 | KRT8 | Keratin, type II cytoskeletal 8 | 53.7 |
| P05937 | CALB1 | Calbindin | 30 |
| P05997 | COL5A2 | Collagen alpha-2(V) chain | 144.8 |
| P06312 | IGKV4-1 | Immunoglobulin kappa variable 4-1 | 13.4 |
| P06331 | IGHV4-34 | Immunoglobulin heavy variable 4-34 | 13.8 |
| P06702 | S100A9 | Protein S100-A9 | 13.2 |
| P06703 | S100A6 | Protein S100-A6 | 10.2 |
| P06727 | APOA4 | Apolipoprotein A-IV | 45.3 |
| P06870 | KLK1 | Kallikrein-1 | 28.9 |
| P07225 | PROS1 | Vitamin K-dependent protein S | 75.1 |
| P07355 | ANXA2 | Annexin A2 | 38.6 |
| P07476 | IVL | Involucrin | 68.4 |
| P07602 | PSAP | Prosaposin | 58.1 |
| P07814 | EPRS | Bifunctional glutamate/proline--tRNA ligase | 170.5 |
| P07900 | HSP90AA1 | Heat shock protein HSP 90-alpha | 84.6 |
| P07996 | THBS1 | Thrombospondin-1 | 129.3 |
| P08123 | COL1A2 | Collagen alpha-2(I) chain | 129.2 |
| P08185 | SERPINA6 | Corticosteroid-binding globulin | 45.1 |
| P08238 | HSP90AB1 | Heat shock protein HSP 90-beta | 83.2 |
| P08246 | ELANE | Neutrophil elastase | 28.5 |
| P08294 | SOD3 | Extracellular superoxide dismutase [Cu-Zn] | 25.8 |
| P08311 | CTSG | Cathepsin G | 28.8 |
| P08493 | MGP | Matrix Gla protein | 12.3 |
| P08603 | CFH | Complement factor H | 139 |
| P08670 | VIM | Vimentin | 53.6 |
| P08697 | SERPINF2 | Alpha-2-antiplasmin | 54.5 |
| P08727 | KRT19 | Keratin, type I cytoskeletal 19 | 44.1 |
| P08779 | KRT16 | Keratin, type I cytoskeletal 16 | 51.2 |
| P08833 | IGFBP1 | Insulin-like growth factor-binding protein 1 | 27.9 |
| P09486 | SPARC | SPARC | 34.6 |
| P09758 | TACSTD2 | Tumor-associated calcium signal transducer 2 | 35.7 |
| P0C0L4 | C4A | Complement C4-A | 192.7 |
| P0DMV9 | HSPA1B | Heat shock 70 kDa protein 1B | 70 |
| P0DOY2 | IGLC2 | Immunoglobulin lambda constant 2 | 11.3 |
| P0DP04 | IGHV3-43D | Immunoglobulin heavy variable 3-43D | 13 |
| P0DP25 | CALM3 | Calmodulin-3 | 16.8 |
| P10451 | SPP1 | Osteopontin | 35.4 |
| P10599 | TXN | Thioredoxin | 11.7 |
| P10645 | CHGA | Chromogranin-A | 50.7 |
| P10809 | HSPD1 | 60 kDa heat shock protein, mitochondrial | 61 |
| P10909 | CLU | Clusterin | 52.5 |
| P11021 | HSPA5 | Endoplasmic reticulum chaperone BiP | 72.3 |
| P12107 | COL11A1 | Collagen alpha-1(XI) chain | 181 |
| P12268 | IMPDH2 | Inosine-5'-monophosphate dehydrogenase 2 | 55.8 |
| P12273 | PIP | Prolactin-inducible protein | 16.6 |
| P12429 | ANXA3 | Annexin A3 | 36.4 |
| P12724 | RNASE3 | Eosinophil cationic protein | 18.4 |
| P12838 | DEFA4 | Neutrophil defensin 4 | 10.5 |
| P13521 | SCG2 | Secretogranin-2 | 70.9 |
| P13645 | KRT10 | Keratin, type I cytoskeletal 10 | 58.8 |
| P13646 | KRT13 | Keratin, type I cytoskeletal 13 | 49.6 |
| P13647 | KRT5 | Keratin, type II cytoskeletal 5 | 62.3 |
| P13796 | LCP1 | Plastin-2 | 70.2 |
| P13929 | ENO3 | Beta-enolase | 47 |
| P13942 | COL11A2 | Collagen alpha-2(XI) chain | 171.7 |
| P14207 | FOLR2 | Folate receptor beta | 29.3 |
| P14618 | PKM | Pyruvate kinase PKM | 57.9 |
| P14923 | JUP | Junction plakoglobin | 81.7 |
| P15144 | ANPEP | Aminopeptidase N | 109.5 |
| P15313 | ATP6V1B1 | V-type proton ATPase subunit B, kidney isoform | 56.8 |
| P15924 | DSP | Desmoplakin | 331.6 |
| P16402 | HIST1H1D | Histone H1.3 | 22.3 |
| P17677 | GAP43 | Neuromodulin | 24.8 |
| P17900 | GM2A | Ganglioside GM2 activator | 20.8 |
| P17987 | TCP1 | T-complex protein 1 subunit alpha | 60.3 |
| P18065 | IGFBP2 | Insulin-like growth factor-binding protein 2 | 34.8 |
| P18206 | VCL | Vinculin | 123.7 |
| P19013 | KRT4 | Keratin, type II cytoskeletal 4 | 56.1 |
| P19652 | ORM2 | Alpha-1-acid glycoprotein 2 | 23.6 |
| P19883 | FST | Follistatin | 38 |
| P20160 | AZU1 | Azurocidin | 26.9 |
| P20774 | OGN | Mimecan | 33.9 |
| P20783 | NTF3 | Neurotrophin-3 | 29.3 |
| P20848 | SERPINA2 | Putative alpha-1-antitrypsin-related protein | 47.9 |
| P20908 | COL5A1 | Collagen alpha-1(V) chain | 183.4 |
| P20930 | FLG | Filaggrin | 434.9 |
| P21810 | BGN | Biglycan | 41.6 |
| P21953 | BCKDHB | 2-oxoisovalerate dehydrogenase subunit beta, mitochondrial | 43.1 |
| P22532 | SPRR2D | Small proline-rich protein 2D | 7.9 |
| P23083 | IGHV1-2 | Immunoglobulin heavy variable 1-2 | 13.1 |
| P24158 | PRTN3 | Myeloblastin | 27.8 |
| P24593 | IGFBP5 | Insulin-like growth factor-binding protein 5 | 30.6 |
| P25311 | AZGP1 | Zinc-alpha-2-glycoprotein | 34.2 |
| P25815 | S100P | Protein S100-P | 10.4 |
| P26447 | S100A4 | Protein S100-A4 | 11.7 |
| P27540 | ARNT | Aryl hydrocarbon receptor nuclear translocator | 86.6 |
| P29508 | SERPINB3 | Serpin B3 | 44.5 |
| P29622 | SERPINA4 | Kallistatin | 48.5 |
| P30043 | BLVRB | Flavin reductase (NADPH) | 22.1 |
| P30740 | SERPINB1 | Leukocyte elastase inhibitor | 42.7 |
| P31025 | LCN1 | Lipocalin-1 | 19.2 |
| P31146 | CORO1A | Coronin-1A | 51 |
| P31151 | S100A7 | Protein S100-A7 | 11.5 |
| P31944 | CASP14 | Caspase-14 | 27.7 |
| P31949 | S100A11 | Protein S100-A11 | 11.7 |
| P32119 | PRDX2 | Peroxiredoxin-2 | 21.9 |
| P32926 | DSG3 | Desmoglein-3 | 107.5 |
| P35237 | SERPINB6 | Serpin B6 | 42.6 |
| P35527 | KRT9 | Keratin, type I cytoskeletal 9 | 62 |
| P35568 | IRS1 | Insulin receptor substrate 1 | 131.5 |
| P35625 | TIMP3 | Metalloproteinase inhibitor 3 | 24.1 |
| P35908 | KRT2 | Keratin, type II cytoskeletal 2 epidermal | 65.4 |
| P36955 | SERPINF1 | Pigment epithelium-derived factor | 46.3 |
| P39900 | MMP12 | Macrophage metalloelastase | 54 |
| P41218 | MNDA | Myeloid cell nuclear differentiation antigen | 45.8 |
| P41221 | WNT5A | Protein Wnt-5a | 42.3 |
| P41271 | NBL1 | Neuroblastoma suppressor of tumorigenicity 1 | 19.4 |
| P43243 | MATR3 | Matrin-3 | 94.6 |
| P47929 | LGALS7 | Galectin-7 | 15.1 |
| P48594 | SERPINB4 | Serpin B4 | 44.8 |
| P48668 | KRT6C | Keratin, type II cytoskeletal 6C | 60 |
| P50591 | TNFSF10 | Tumor necrosis factor ligand superfamily member 10 | 32.5 |
| P51884 | LUM | Lumican | 38.4 |
| P52209 | PGD | 6-phosphogluconate dehydrogenase, decarboxylating | 53.1 |
| P54108 | CRISP3 | Cysteine-rich secretory protein 3 | 27.6 |
| P54652 | HSPA2 | Heat shock-related 70 kDa protein 2 | 70 |
| P59665 | DEFA1 | Neutrophil defensin 1 | 10.2 |
| P60174 | TPI1 | Triosephosphate isomerase | 30.8 |
| P60602 | ROMO1 | Reactive oxygen species modulator 1 | 8.2 |
| P60709 | ACTB | Actin, cytoplasmic 1 | 41.7 |
| P61604 | HSPE1 | 10 kDa heat shock protein, mitochondrial | 10.9 |
| P61626 | LYZ | Lysozyme C | 16.5 |
| P61764 | STXBP1 | Syntaxin-binding protein 1 | 67.5 |
| P61769 | B2M | Beta-2-microglobulin | 13.7 |
| P61916 | NPC2 | NPC intracellular cholesterol transporter 2 | 16.6 |
| P62805 | H4C1 | Histone H4 | 11.4 |
| P62987 | UBA52 | Ubiquitin-60S ribosomal protein L40 | 14.7 |
| P68371 | TUBB4B | Tubulin beta-4B chain | 49.8 |
| P68431 | HIST1H3A | Histone H3.1 | 15.4 |
| P68871 | HBB | Hemoglobin subunit beta | 16 |
| P69905 | HBA1 | Hemoglobin subunit alpha | 15.2 |
| P78346 | RPP30 | Ribonuclease P protein subunit p30 | 29.3 |
| P78539 | SRPX | Sushi repeat-containing protein SRPX | 51.5 |
| P80188 | LCN2 | Neutrophil gelatinase-associated lipocalin | 22.6 |
| P80303 | NUCB2 | Nucleobindin-2 | 50.2 |
| P80511 | S100A12 | Protein S100-A12 | 10.6 |
| P80748 | IGLV3-21 | Immunoglobulin lambda variable 3-21 | 12.4 |
| P81605 | DCD | Dermcidin | 11.3 |
| P84243 | H3-3A | Histone H3.3 | 15.3 |
| P85298 | ARHGAP8 | Rho GTPase-activating protein 8 | 53.5 |
| P98073 | TMPRSS15 | Enteropeptidase | 112.9 |
| P98160 | HSPG2 | Basement membrane-specific heparan sulfate proteoglycan core protein | 468.5 |
| Q01469 | FABP5 | Fatty acid-binding protein 5 | 15.2 |
| Q01518 | CAP1 | Adenylyl cyclase-associated protein 1 | 51.9 |
| Q02413 | DSG1 | Desmoglein-1 | 113.7 |
| Q03591 | CFHR1 | Complement factor H-related protein 1 | 37.6 |
| Q04695 | KRT17 | Keratin, type I cytoskeletal 17 | 48.1 |
| Q05639 | EEF1A2 | Elongation factor 1-alpha 2 | 50.4 |
| Q06830 | PRDX1 | Peroxiredoxin-1 | 22.1 |
| Q08188 | TGM3 | Protein-glutamine gamma-glutamyltransferase E | 76.6 |
| Q08554 | DSC1 | Desmocollin-1 | 99.9 |
| Q08629 | SPOCK1 | Testican-1 | 49.1 |
| Q09666 | AHNAK | Neuroblast differentiation-associated protein AHNAK | 628.7 |
| Q0VGL1 | LAMTOR4 | Ragulator complex protein LAMTOR4 | 10.7 |
| Q11206 | ST3GAL4 | CMP-N-acetylneuraminate-beta-galactosamide-alpha-2,3-sialyltransferase 4 | 38 |
| Q12791 | KCNMA1 | Calcium-activated potassium channel subunit alpha-1 | 137.5 |
| Q13103 | SPP2 | Secreted phosphoprotein 24 | 24.3 |
| Q13217 | DNAJC3 | DnaJ homolog subfamily C member 3 | 57.5 |
| Q13316 | DMP1 | Dentin matrix acidic phosphoprotein 1 | 55.8 |
| Q13438 | OS9 | Protein OS-9 | 75.5 |
| Q13751 | LAMB3 | Laminin subunit beta-3 | 129.5 |
| Q13753 | LAMC2 | Laminin subunit gamma-2 | 130.9 |
| Q13835 | PKP1 | Plakophilin-1 | 82.8 |
| Q14203 | DCTN1 | Dynactin subunit 1 | 141.6 |
| Q14669 | TRIP12 | E3 ubiquitin-protein ligase TRIP12 | 220.3 |
| Q15063 | POSTN | Periostin | 93.3 |
| Q15113 | PCOLCE | Procollagen C-endopeptidase enhancer 1 | 47.9 |
| Q15233 | NONO | Non-POU domain-containing octamer-binding protein | 54.2 |
| Q15404 | RSU1 | Ras suppressor protein 1 | 31.5 |
| Q15517 | CDSN | Corneodesmosin | 51.5 |
| Q15582 | TGFBI | Transforming growth factor-beta-induced protein ig-h3 | 74.6 |
| Q15699 | ALX1 | ALX homeobox protein 1 | 36.9 |
| Q15768 | EFNB3 | Ephrin-B3 | 35.8 |
| Q16378 | PRR4 | Proline-rich protein 4 | 15.1 |
| Q16560 | SNRNP35 | U11/U12 small nuclear ribonucleoprotein 35 kDa protein | 29.4 |
| Q16610 | ECM1 | Extracellular matrix protein 1 | 60.6 |
| Q16777 | H2AC20 | Histone H2A type 2-C | 14 |
| Q16778 | H2BC21 | Histone H2B type 2-E | 13.9 |
| Q16787 | LAMA3 | Laminin subunit alpha-3 | 366.4 |
| Q17RF5 | ODAPH | Odontogenesis associated phosphoprotein | 15.5 |
| Q2M3M2 | SLC5A9 | Sodium/glucose cotransporter 4 | 74 |
| Q2TAC2 | CCDC57 | Coiled-coil domain-containing protein 57 | 103 |
| Q33E94 | RFX4 | Transcription factor RFX4 | 83.3 |
| Q4G0U5 | CFAP221 | Cilia- and flagella-associated protein 221 | 96.8 |
| Q53GS9 | USP39 | U4/U6.U5 tri-snRNP-associated protein 2 | 65.3 |
| Q562R1 | ACTBL2 | Beta-actin-like protein 2 | 42 |
| Q5D862 | FLG2 | Filaggrin-2 | 247.9 |
| Q5JYT7 | KIAA1755 | Uncharacterized protein KIAA1755 | 130.8 |
| Q5MNZ9 | WIPI1 | WD repeat domain phosphoinositide-interacting protein 1 | 48.6 |
| Q5SWL8 | PRAMEF19 | PRAME family member 19 | 55.2 |
| Q5T749 | KPRP | Keratinocyte proline-rich protein | 64.1 |
| Q5TEZ5 | C6orf163 | Uncharacterized protein C6orf163 | 38.5 |
| Q5TF21 | SOGA3 | Protein SOGA3 | 103.1 |
| Q5VYM1 | C9orf131 | Uncharacterized protein C9orf131 | 117.7 |
| Q5VZ89 | DENND4C | DENN domain-containing protein 4C | 212.6 |
| Q5W0V3 | FAM160B1 | Protein FAM160B1 | 86.5 |
| Q6AWC8 | LOC100129027 | Putative uncharacterized protein LOC100129027 | 16.8 |
| Q6E0U4 | DMKN | Dermokine | 47.1 |
| Q6IS14 | EIF5AL1 | Eukaryotic translation initiation factor 5A-1-like | 16.8 |
| Q6NUK1 | SLC25A24 | Calcium-binding mitochondrial carrier protein SCaMC-1 | 53.3 |
| Q6P5S2 | LEG1 | Protein LEG1 homolog | 37.9 |
| Q6UWP8 | SBSN | Suprabasin | 60.5 |
| Q6UWX4 | HHIPL2 | HHIP-like protein 2 | 80.7 |
| Q6UWY5 | OLFML1 | Olfactomedin-like protein 1 | 45.9 |
| Q6UX41 | BTNL8 | Butyrophilin-like protein 8 | 56.7 |
| Q6X4U4 | SOSTDC1 | Sclerostin domain-containing protein 1 | 23.3 |
| Q6ZMV9 | KIF6 | Kinesin-like protein KIF6 | 92.5 |
| Q6ZN16 | MAP3K15 | Mitogen-activated protein kinase kinase kinase 15 | 147.3 |
| Q6ZN66 | GBP6 | Guanylate-binding protein 6 | 72.4 |
| Q6ZP82 | CCDC141 | Coiled-coil domain-containing protein 141 | 166.2 |
| Q6ZRH7 | CATSPERG | Cation channel sperm-associated protein subunit gamma | 132.9 |
| Q6ZRT6 | PRR23B | Proline-rich protein 23B | 28.3 |
| Q6ZSG1 | RNF165 | E3 ubiquitin-protein ligase RNF165 | 39.5 |
| Q6ZSJ9 | SHISA6 | Protein shisa-6 | 55.7 |
| Q709C8 | VPS13C | Vacuolar protein sorting-associated protein 13C | 422.1 |
| Q71DI3 | H3C15 | Histone H3.2 | 15.4 |
| Q71U36 | TUBA1A | Tubulin alpha-1A chain | 50.1 |
| Q71UI9 | H2AZ2 | Histone H2A.V | 13.5 |
| Q7L7L0 | HIST3H2A | Histone H2A type 3 | 14.1 |
| Q7RTS7 | KRT74 | Keratin, type II cytoskeletal 74 | 57.8 |
| Q7Z6K1 | THAP5 | THAP domain-containing protein 5 | 45.4 |
| Q7Z745 | MROH2B | Maestro heat-like repeat-containing protein family member 2B | 180.7 |
| Q86UY8 | NT5DC3 | 5'-nucleotidase domain-containing protein 3 | 63.4 |
| Q86V81 | ALYREF | THO complex subunit 4 | 26.9 |
| Q86YZ3 | HRNR | Hornerin | 282.2 |
| Q8IVS2 | MCAT | Malonyl-CoA-acyl carrier protein transacylase, mitochondrial | 42.9 |
| Q8IWF9 | PE | Coiled-coil domain-containing protein 83 | 48.8 |
| Q8N0W7 | FMR1NB | Fragile X mental retardation 1 neighbor protein | 29.2 |
| Q8N129 | CNPY4 | Protein canopy homolog 4 | 28.3 |
| Q8N1N4 | KRT78 | Keratin, type II cytoskeletal 78 | 56.8 |
| Q8N9V2 | TRIML1 | Probable E3 ubiquitin-protein ligase TRIML1 | 53 |
| Q8NDH2 | CCDC168 | Coiled-coil domain-containing protein 168 | 277.8 |
| Q8NEV8 | EXPH5 | Exophilin-5 | 222.4 |
| Q8NFH8 | REPS2 | RalBP1-associated Eps domain-containing protein 2 | 71.5 |
| Q8NFU4 | FDCSP | Follicular dendritic cell secreted peptide | 9.7 |
| Q8NFW1 | COL22A1 | Collagen alpha-1(XXII) chain | 161 |
| Q8NHH9 | ATL2 | Atlastin-2 | 66.2 |
| Q8TAG9 | EXOC6 | Exocyst complex component 6 | 93.7 |
| Q8TD10 | MIPOL1 | Mirror-image polydactyly gene 1 protein | 51.5 |
| Q8TF44 | C2CD4C | C2 calcium-dependent domain-containing protein 4C | 44.5 |
| Q8WVR3 | C7orf43 | Microtubule-associated protein 11 | 62.6 |
| Q8WXD2 | SCG3 | Secretogranin-3 | 53 |
| Q8WXU2 | DNAAF4 | Dynein assembly factor 4, axonemal | 48.5 |
| Q92743 | HTRA1 | Serine protease HTRA1 | 51.3 |
| Q92817 | EVPL | Envoplakin | 231.5 |
| Q93034 | CUL5 | Cullin-5 | 90.9 |
| Q969E8 | TSR2 | Pre-rRNA-processing protein TSR2 homolog | 20.9 |
| Q96A11 | GAL3ST3 | Galactose-3-O-sulfotransferase 3 | 48.9 |
| Q96BP3 | PPWD1 | Peptidylprolyl isomerase domain and WD repeat-containing protein 1 | 73.5 |
| Q96CG8 | CTHRC1 | Collagen triple helix repeat-containing protein 1 | 26.2 |
| Q96DA0 | ZG16B | Zymogen granule protein 16 homolog B | 22.7 |
| Q96FQ6 | S100A16 | Protein S100-A16 | 11.8 |
| Q96NU1 | SAMD11 | Sterile alpha motif domain-containing protein 11 | 72.7 |
| Q96P63 | SERPINB12 | Serpin B12 | 46.2 |
| Q96QA5 | GSDMA | Gasdermin-A | 49.3 |
| Q99218 | AMELY | Amelogenin, Y isoform | 23.2 |
| Q99497 | PARK7 | Parkinson disease protein 7 | 19.9 |
| Q99536 | VAT1 | Synaptic vesicle membrane protein VAT-1 homolog | 41.9 |
| Q99574 | SERPINI1 | Neuroserpin | 46.4 |
| Q99758 | ABCA3 | ATP-binding cassette sub-family A member 3 | 191.2 |
| Q99969 | RARRES2 | Retinoic acid receptor responder protein 2 | 18.6 |
| Q99983 | OMD | Osteomodulin | 49.5 |
| Q9BZ81 | MAGEB5 | Melanoma-associated antigen B5 | 31.9 |
| Q9BZD4 | NUF2 | Kinetochore protein Nuf2 | 54.3 |
| Q9H160 | ING2 | Inhibitor of growth protein 2 | 32.8 |
| Q9H239 | MMP28 | Matrix metalloproteinase-28 | 58.9 |
| Q9HCY8 | S100A14 | Protein S100-A14 | 11.7 |
| Q9NP70 | AMBN | Ameloblastin | 48.3 |
| Q9NQW6 | ANLN | Anillin | 124.1 |
| Q9NRM1 | ENAM | Enamelin | 128.7 |
| Q9NRN5 | OLFML3 | Olfactomedin-like protein 3 | 46 |
| Q9NS15 | LTBP3 | Latent-transforming growth factor beta-binding protein 3 | 139.3 |
| Q9NTM9 | CUTC | Copper homeostasis protein cutC homolog | 29.3 |
| Q9NVU0 | POLR3E | DNA-directed RNA polymerase III subunit RPC5 | 79.8 |
| Q9NYI0 | PSD3 | PH and SEC7 domain-containing protein 3 | 116 |
| Q9NZT1 | CALML5 | Calmodulin-like protein 5 | 15.9 |
| Q9NZW4 | DSPP | Dentin sialophosphoprotein | 131.1 |
| Q9P0M6 | MACROH2A2 | Core histone macro-H2A.2 | 40 |
| Q9P246 | STIM2 | Stromal interaction molecule 2 | 83.9 |
| Q9P2N2 | ARHGAP28 | Rho GTPase-activating protein 28 | 82 |
| Q9UBC9 | SPRR3 | Small proline-rich protein 3 | 18.1 |
| Q9UBG3 | CRNN | Cornulin | 53.5 |
| Q9UBN7 | HDAC6 | Histone deacetylase 6 | 131.3 |
| Q9UBP9 | GULP1 | PTB domain-containing engulfment adapter protein 1 | 34.5 |
| Q9UBS3 | DNAJB9 | DnaJ homolog subfamily B member 9 | 25.5 |
| Q9UBX7 | KLK11 | Kallikrein-11 | 31 |
| Q9UGM3 | DMBT1 | Deleted in malignant brain tumors 1 protein | 260.6 |
| Q9UGM5 | FETUB | Fetuin-B | 42 |
| Q9UHF0 | TAC3 | Tachykinin-3 | 13.4 |
| Q9UK55 | SERPINA10 | Protein Z-dependent protease inhibitor | 50.7 |
| Q9UKF2 | ADAM30 | Disintegrin and metalloproteinase domain-containing protein 30 | 88.9 |
| Q9UMD9 | COL17A1 | Collagen alpha-1(XVII) chain | 150.3 |
| Q9UPN4 | AZI1; CEP131 | Centrosomal protein of 131 kDa | 122.1 |
| Q9Y240 | CLEC11A | C-type lectin domain family 11 member A | 35.7 |
| Q9Y4I1 | MYO5A | Unconventional myosin-Va | 215.3 |
| Q9Y587 | AP4S1 | AP-4 complex subunit sigma-1 | 17 |
| Q9Y5K2 | KLK4 | Kallikrein-4 | 27 |

**Supplementary Table S2 : Proteins unique to HSPM-affected enamel (n = 206 proteins)**

| **Proteins Unique to HSPM Group (n=206)** | | |
| --- | --- | --- |
| **UniProt Accession** | **Gene Symbol** | **Protein Description** |
| A0A075B6I9 | IGLV7-46 | Immunoglobulin lambda variable 7-46 |
| A0A075B6K4 | IGLV3-10 | Immunoglobulin lambda variable 3-10 |
| A0A075B6S5 | IGKV1-27 | Immunoglobulin kappa variable 1-27 |
| A0A0A0MRZ8 | IGKV3D-11 | Immunoglobulin kappa variable 3D-11 |
| A0A0B4J1V0 | IGHV3-15 | Immunoglobulin heavy variable 3-15 |
| A0A0B4J1X5 | IGHV3-74 | Immunoglobulin heavy variable 3-74 |
| A0A0B4J2D9 | IGKV1D-13 | Immunoglobulin kappa variable 1D-13 |
| A0A0C4DH29 | IGHV1-3 | Immunoglobulin heavy variable 1-3 |
| A5A3E0 | POTEF | POTE ankyrin domain family member F |
| A6NMY6 | ANXA2P2 | Putative annexin A2-like protein |
| O00291 | HIP1 | Huntingtin-interacting protein 1 |
| O00584 | RNASET2 | Ribonuclease T2 |
| O14829 | PPEF1 | Serine/threonine-protein phosphatase with EF-hands 1 |
| O14974 | PPP1R12A | Protein phosphatase 1 regulatory subunit 12A |
| O15041 | SEMA3E | Semaphorin-3E |
| O15169 | AXIN1 | Axin-1 |
| O15240 | VGF | Neurosecretory protein VGF |
| O15335 | CHAD | Chondroadherin |
| O15355 | PPM1G | Protein phosphatase 1G |
| O43432 | EIF4G3 | Eukaryotic translation initiation factor 4 gamma 3 |
| O60938 | KERA | Keratocan |
| O75533 | SF3B1 | Splicing factor 3B subunit 1 |
| O75594 | PGLYRP1 | Peptidoglycan recognition protein 1 |
| O95613 | PCNT | Pericentrin |
| P00450 | CP | Ceruloplasmin |
| P00738 | HP | Haptoglobin |
| P00742 | F10 | Coagulation factor X |
| P01019 | AGT | Angiotensinogen |
| P01023 | A2M | Alpha-2-macroglobulin |
| P01033 | TIMP1 | Metalloproteinase inhibitor 1 |
| P01034 | CST3 | Cystatin-C |
| P01040 | CSTA | Cystatin-A |
| P01137 | TGFB1 | Transforming growth factor beta-1 proprotein |
| P01344 | IGF2 | Insulin-like growth factor II |
| P01591 | JCHAIN | Immunoglobulin J chain |
| P01624 | IGKV3-15 | Immunoglobulin kappa variable 3-15 |
| P01700 | IGLV1-47 | Immunoglobulin lambda variable 1-47 |
| P01701 | IGLV1-51 | Immunoglobulin lambda variable 1-51 |
| P01703 | IGLV1-40 | Immunoglobulin lambda variable 1-40 |
| P01714 | IGLV3-19 | Immunoglobulin lambda variable 3-19 |
| P01718 | IGLV3-27 | Immunoglobulin lambda variable 3-27 |
| P01721 | IGLV6-57 | Immunoglobulin lambda variable 6-57 |
| P01768 | IGHV3-30 | Immunoglobulin heavy variable 3-30 |
| P01780 | IGHV3-7 | Immunoglobulin heavy variable 3-7 |
| P01859 | IGHG2 | Immunoglobulin heavy constant gamma 2 |
| P01860 | IGHG3 | Immunoglobulin heavy constant gamma 3 |
| P01871 | IGHM | Immunoglobulin heavy constant mu |
| P01877 | IGHA2 | Immunoglobulin heavy constant alpha 2 |
| P02042 | HBD | Hemoglobin subunit delta |
| P02649 | APOE | Apolipoprotein E |
| P02652 | APOA2 | Apolipoprotein A-II |
| P02654 | APOC1 | Apolipoprotein C-I |
| P02741 | CRP | C-reactive protein |
| P02743 | APCS | Serum amyloid P-component |
| P02748 | C9 | Complement component |
| P02749 | APOH | Beta-2-glycoprotein 1 |
| P02753 | RBP4 | Retinol-binding protein 4 |
| P02775 | PPBP | Platelet basic protein |
| P02790 | HPX | Hemopexin |
| P02808 | STATH | Statherin |
| P02818 | BGLAP | Osteocalcin |
| P03950 | ANG | Angiogenin |
| P03973 | SLPI | Antileukoproteinase |
| P04040 | CAT | Catalase |
| P04070 | PROC | Vitamin K-dependent protein C |
| P04085 | PDGFA | Platelet-derived growth factor subunit A |
| P04217 | A1BG | Alpha-1B-glycoprotein |
| P04430 | IGKV1-16 | Immunoglobulin kappa variable 1-16 |
| P04432 | IGKV1D-39 | Immunoglobulin kappa variable 1D-39 |
| P05019 | IGF1 | Insulin-like growth factor I |
| P05060 | CHGB | Secretogranin-1 |
| P05067 | APP | Amyloid-beta precursor protein |
| P05164 | MPO | Myeloperoxidase |
| P05546 | SERPIND1 | Heparin cofactor 2 |
| P05937 | CALB1 | Calbindin |
| P05997 | COL5A2 | Collagen alpha-2(V) chain |
| P06312 | IGKV4-1 | Immunoglobulin kappa variable 4-1 |
| P06703 | S100A6 | Protein S100-A6 |
| P06727 | APOA4 | Apolipoprotein A-IV |
| P07225 | PROS1 | Vitamin K-dependent protein S |
| P07996 | THBS1 | Thrombospondin-1 |
| P08185 | SERPINA6 | Corticosteroid-binding globulin |
| P08246 | ELANE | Neutrophil elastase |
| P08294 | SOD3 | Extracellular superoxide dismutase [Cu-Zn] |
| P08311 | CTSG | Cathepsin G |
| P08493 | MGP | Matrix Gla protein |
| P08603 | CFH | Complement factor H |
| P08833 | IGFBP1 | Insulin-like growth factor-binding protein 1 |
| P09486 | SPARC | SPARC |
| P0C0L4 | C4A | Complement C4-A |
| P0DP25 | CALM3 | Calmodulin-3 |
| P10451 | SPP1 | Osteopontin |
| P10645 | CHGA | Chromogranin-A |
| P11021 | HSPA5 | Endoplasmic reticulum chaperone BiP |
| P12107 | COL11A1 | Collagen alpha-1(XI) chain |
| P12429 | ANXA3 | Annexin A3 |
| P12724 | RNASE3 | Eosinophil cationic protein |
| P12838 | DEFA4 | Neutrophil defensin 4 |
| P13521 | SCG2 | Secretogranin-2 |
| P14207 | FOLR2 | Folate receptor beta |
| P17900 | GM2A | Ganglioside GM2 activator |
| P18065 | IGFBP2 | Insulin-like growth factor-binding protein 2 |
| P18206 | VCL | Vinculin |
| P19652 | ORM2 | Alpha-1-acid glycoprotein 2 |
| P19883 | FST | Follistatin |
| P20160 | AZU1 | Azurocidin |
| P20774 | OGN | Mimecan |
| P20783 | NTF3 | Neurotrophin-3 |
| P20848 | SERPINA2 | Putative alpha-1-antitrypsin-related protein |
| P20908 | COL5A1 | Collagen alpha-1(V) chain |
| P21810 | BGN | Biglycan |
| P21953 | BCKDHB | 2-oxoisovalerate dehydrogenase subunit beta, mitochondrial |
| P24158 | PRTN3 | Myeloblastin |
| P24593 | IGFBP5 | Insulin-like growth factor-binding protein 5 |
| P25815 | S100P | Protein S100-P |
| P26447 | S100A4 | Protein S100-A4 |
| P29508 | SERPINB3 | Serpin B3 |
| P29622 | SERPINA4 | Kallistatin |
| P31025 | LCN1 | Lipocalin-1 |
| P35237 | SERPINB6 | Serpin B6 |
| P35625 | TIMP3 | Metalloproteinase inhibitor 3 |
| P41221 | WNT5A | Protein Wnt-5a |
| P41271 | NBL1 | Neuroblastoma suppressor of tumorigenicity 1 |
| P48594 | SERPINB4 | Serpin B4 |
| P48668 | KRT6C | Keratin, type II cytoskeletal 6C |
| P50591 | TNFSF10 | Tumor necrosis factor ligand superfamily member 10 |
| P51884 | LUM | Lumican |
| P54108 | CRISP3 | Cysteine-rich secretory protein 3 |
| P61604 | HSPE1 | 10 kDa heat shock protein, mitochondrial |
| P61764 | STXBP1 | Syntaxin-binding protein 1 |
| P61916 | NPC2 | NPC intracellular cholesterol transporter 2 |
| P62805 | H4C1 | Histone H4 |
| P78346 | RPP30 | Ribonuclease P protein subunit p30 |
| P78539 | SRPX | Sushi repeat-containing protein SRPX |
| P80188 | LCN2 | Neutrophil gelatinase-associated lipocalin |
| P80303 | NUCB2 | Nucleobindin-2 |
| P80511 | S100A12 | Protein S100-A12 |
| P80748 | IGLV3-21 | Immunoglobulin lambda variable 3-21 |
| P98160 | HSPG2 | Basement membrane-specific heparan sulfate proteoglycan core protein |
| Q03591 | CFHR1 | Complement factor H-related protein 1 |
| Q06830 | PRDX1 | Peroxiredoxin-1 |
| Q08554 | DSC1 | Desmocollin-1 |
| Q08629 | SPOCK1 | Testican-1 |
| Q13103 | SPP2 | Secreted phosphoprotein 24 |
| Q13217 | DNAJC3 | DnaJ homolog subfamily C member 3 |
| Q13316 | DMP1 | Dentin matrix acidic phosphoprotein 1 |
| Q13438 | OS9 | Protein OS-9 |
| Q13751 | LAMB3 | Laminin subunit beta-3 |
| Q14669 | TRIP12 | E3 ubiquitin-protein ligase TRIP12 |
| Q15063 | POSTN | Periostin |
| Q15404 | RSU1 | Ras suppressor protein 1 |
| Q15582 | TGFBI | Transforming growth factor-beta-induced protein ig-h3 |
| Q16560 | SNRNP35 | U11/U12 small nuclear ribonucleoprotein 35 kDa protein |
| Q16778 | H2BC21 | Histone H2B type 2-E |
| Q16787 | LAMA3 | Laminin subunit alpha-3 |
| Q17RF5 | ODAPH | Odontogenesis associated phosphoprotein |
| Q2M3M2 | SLC5A9 | Sodium/glucose cotransporter 4 |
| Q2TAC2 | CCDC57 | Coiled-coil domain-containing protein 57 |
| Q562R1 | ACTBL2 | Beta-actin-like protein 2 |
| Q5MNZ9 | WIPI1 | WD repeat domain phosphoinositide-interacting protein 1 |
| Q5TEZ5 | C6orf163 | Uncharacterized protein C6orf163 |
| Q5VYM1 | C9orf131 | Uncharacterized protein C9orf131 |
| Q5VZ89 | DENND4C | DENN domain-containing protein 4C |
| Q6AWC8 | LOC100129027 | Putative uncharacterized protein LOC100129027 |
| Q6E0U4 | DMKN | Dermokine |
| Q6UWX4 | HHIPL2 | HHIP-like protein 2 |
| Q6UWY5 | OLFML1 | Olfactomedin-like protein 1 |
| Q6X4U4 | SOSTDC1 | Sclerostin domain-containing protein 1 |
| Q6ZRT6 | PRR23B | Proline-rich protein 23B |
| Q6ZSG1 | RNF165 | E3 ubiquitin-protein ligase RNF165 |
| Q6ZSJ9 | SHISA6 | Protein shisa-6 |
| Q7Z745 | MROH2B | Maestro heat-like repeat-containing protein family member 2B |
| Q8IWF9 | CCDC83 | Coiled-coil domain-containing protein 83 |
| Q8N0W7 | FMR1NB | Fragile X mental retardation 1 neighbor protein |
| Q8N129 | CNPY4 | Protein canopy homolog 4 |
| Q8NDH2 | CCDC168 | Coiled-coil domain-containing protein 168 |
| Q8NFH8 | REPS2 | RalBP1-associated Eps domain-containing protein 2 |
| Q8NFU4 | FDCSP | Follicular dendritic cell secreted peptide |
| Q8NFW1 | COL22A1 | Collagen alpha-1(XXII) chain |
| Q8NHH9 | ATL2 | Atlastin-2 |
| Q8TAG9 | EXOC6 | Exocyst complex component 6 |
| Q8TF44 | C2CD4C | C2 calcium-dependent domain-containing protein 4C |
| Q8WXD2 | SCG3 | Secretogranin-3 |
| Q92743 | HTRA1 | Serine protease HTRA1 |
| Q93034 | CUL5 | Cullin-5 |
| Q96A11 | GAL3ST3 | Galactose-3-O-sulfotransferase 3 |
| Q96CG8 | CTHRC1 | Collagen triple helix repeat-containing protein 1 |
| Q99218 | AMELY | Amelogenin, Y isoform |
| Q99574 | SERPINI1 | Neuroserpin |
| Q99969 | RARRES2 | Retinoic acid receptor responder protein 2 |
| Q99983 | OMD | Osteomodulin |
| Q9BZ81 | MAGEB5 | Melanoma-associated antigen B5 |
| Q9BZD4 | NUF2 | Kinetochore protein Nuf2 |
| Q9H160 | ING2 | Inhibitor of growth protein 2 |
| Q9H239 | MMP28 | Matrix metalloproteinase-28 |
| Q9NRM1 | ENAM | Enamelin |
| Q9NS15 | LTBP3 | Latent-transforming growth factor beta-binding protein 3 |
| Q9NVU0 | POLR3E | DNA-directed RNA polymerase III subunit RPC5 |
| Q9NZT1 | CALML5 | Calmodulin-like protein 5 |
| Q9P246 | STIM2 | Stromal interaction molecule 2 |
| Q9UBP9 | GULP1 | PTB domain-containing engulfment adapter protein 1 |
| Q9UBS3 | DNAJB9 | DnaJ homolog subfamily B member 9 |
| Q9UHF0 | TAC3 | Tachykinin-3 |
| Q9UK55 | SERPINA10 | Protein Z-dependent protease inhibitor |
| Q9Y240 | CLEC11A | C-type lectin domain family 11 member A |
| Q9Y4I1 | MYO5A | Unconventional myosin-Va |

**Supplementary Table S3 : Proteins unique to MIH-affected enamel (n = 109 proteins)**

| **Proteins Unique to MIH Group (n=109)** | | |
| --- | --- | --- |
| **UniProt Accession** | **Gene Symbol** | **Protein Description** |
| A0A0A0MS15 | IGHV3-49 | Immunoglobulin heavy variable 3-49 |
| A8MXQ7 | LOC642574 | Putative IQ motif and ankyrin repeat domain-containing protein LOC642574 |
| O43247 | TEX33 | Testis-expressed protein 33 |
| O43497 | CACNA1G | Voltage-dependent T-type calcium channel subunit alpha-1G |
| O60437 | PPL | Periplakin |
| O60729 | CDC14B | Dual specificity protein phosphatase CDC14B |
| O75367 | H2AFY | Core histone macro-H2A.1 |
| O95171 | SCEL | Sciellin |
| O95477 | ABCA1 | Phospholipid-transporting ATPase ABCA1 |
| O95487 | SEC24B | Protein transport protein Sec24B |
| P02545 | LMNA | Prelamin-A/C |
| P04075 | ALDOA | Fructose-bisphosphate aldolase A |
| P07476 | IVL | Involucrin |
| P07814 | EPRS | Bifunctional glutamate/proline--tRNA ligase |
| P07900 | HSP90AA1 | Heat shock protein HSP 90-alpha |
| P08238 | HSP90AB1 | Heat shock protein HSP 90-beta |
| P08727 | KRT19 | Keratin, type I cytoskeletal 19 |
| P09758 | TACSTD2 | Tumor-associated calcium signal transducer 2 |
| P0DMV9 | HSPA1B | Heat shock 70 kDa protein 1B |
| P10809 | HSPD1 | 60 kDa heat shock protein, mitochondrial |
| P12268 | IMPDH2 | Inosine-5'-monophosphate dehydrogenase 2 |
| P13929 | ENO3 | Beta-enolase |
| P14618 | PKM | Pyruvate kinase PKM |
| P15144 | ANPEP | Aminopeptidase N |
| P15313 | ATP6V1B1 | V-type proton ATPase subunit B, kidney isoform |
| P16402 | HIST1H1D | Histone H1.3 |
| P17677 | GAP43 | Neuromodulin |
| P17987 | TCP1 | T-complex protein 1 subunit alpha |
| P20930 | FLG | Filaggrin |
| P22532 | SPRR2D | Small proline-rich protein 2D |
| P27540 | ARNT | Aryl hydrocarbon receptor nuclear translocator |
| P30043 | BLVRB | Flavin reductase (NADPH) |
| P32119 | PRDX2 | Peroxiredoxin-2 |
| P32926 | DSG3 | Desmoglein-3 |
| P35568 | IRS1 | Insulin receptor substrate 1 |
| P41218 | MNDA | Myeloid cell nuclear differentiation antigen |
| P43243 | MATR3 | Matrin-3 |
| P52209 | PGD | 6-phosphogluconate dehydrogenase, decarboxylating |
| P54652 | HSPA2 | Heat shock-related 70 kDa protein 2 |
| P60174 | TPI1 | Triosephosphate isomerase |
| P60602 | ROMO1 | Reactive oxygen species modulator 1 |
| P68371 | TUBB4B | Tubulin beta-4B chain 1 |
| P68431 | H3C1 | Histone H3.1 |
| P84243 | H3-3A | Histone H3.3 |
| P85298 | ARHGAP8 | Rho GTPase-activating protein 8 |
| P98073 | TMPRSS15 | Enteropeptidase |
| Q01518 | CAP1 | Adenylyl cyclase-associated protein 1 |
| Q05639 | EEF1A2 | Elongation factor 1-alpha 2 |
| Q09666 | AHNAK | Neuroblast differentiation-associated protein AHNAK |
| Q0VGL1 | LAMTOR4 | Ragulator complex protein LAMTOR4 |
| Q11206 | ST3GAL4 | CMP-N-acetylneuraminate-beta-galactosamide-alpha-2,3-sialyltransferase 4 |
| Q12791 | KCNMA1 | Calcium-activated potassium channel subunit alpha-1 |
| Q14203 | DCTN1 | Dynactin subunit 1 |
| Q15233 | NONO | Non-POU domain-containing octamer-binding protein |
| Q15699 | ALX1 | ALX homeobox protein 1 |
| Q15768 | EFNB3 | Ephrin-B3 |
| Q16378 | PRR4 | Proline-rich protein 4 |
| Q16610 | ECM1 | Extracellular matrix protein 1 |
| Q33E94 | RFX4 | Transcription factor RFX4 |
| Q4G0U5 | CFAP221 | Cilia- and flagella-associated protein 221 |
| Q53GS9 | USP39 | U4/U6.U5 tri-snRNP-associated protein 2 |
| Q5JYT7 | KIAA1755 | Uncharacterized protein KIAA1755 |
| Q5SWL8 | PRAMEF19 | PRAME family member 19 |
| Q5TF21 | SOGA3 | Protein SOGA3 |
| Q5W0V3 | FAM160B1 | Protein FAM160B1 |
| Q6IS14 | EIF5AL1 | Eukaryotic translation initiation factor 5A-1-like |
| Q6NUK1 | SLC25A24 | Calcium-binding mitochondrial carrier protein SCaMC-1 |
| Q6UWP8 | SBSN | Suprabasin |
| Q6UX41 | BTNL8 | Butyrophilin-like protein 8 |
| Q6ZMV9 | KIF6 | Kinesin-like protein KIF6 |
| Q6ZN16 | MAP3K15 | Mitogen-activated protein kinase kinase kinase 15 |
| Q6ZN66 | GBP6 | Guanylate-binding protein 6 |
| Q6ZP82 | CCDC141 | Coiled-coil domain-containing protein 141 |
| Q6ZRH7 | CATSPERG | Cation channel sperm-associated protein subunit gamma |
| Q709C8 | VPS13C | Vacuolar protein sorting-associated protein 13C |
| Q71DI3 | H3C15 | Histone H3.2 |
| Q71U36 | TUBA1A | Tubulin alpha-1A chain |
| Q7L7L0 | HIST3H2A | Histone H2A type 3 |
| Q7Z6K1 | THAP5 | THAP domain-containing protein 5 |
| Q86UY8 | NT5DC3 | 5'-nucleotidase domain-containing protein 3 |
| Q86V81 | ALYREF | THO complex subunit 4 |
| Q8IVS2 | MCAT | Malonyl-CoA-acyl carrier protein transacylase, mitochondrial |
| Q8N9V2 | TRIML1 | Probable E3 ubiquitin-protein ligase TRIML1 |
| Q8TD10 | MIPOL1 | Mirror-image polydactyly gene 1 protein |
| Q8WVR3 | MAP11 | Microtubule-associated protein 11 |
| Q8WXU2 | DNAAF4 | Dynein assembly factor 4, axonemal |
| Q92817 | EVPL | Envoplakin |
| Q969E8 | TSR2 | Pre-rRNA-processing protein TSR2 homolog |
| Q96BP3 | PPWD1 | Peptidylprolyl isomerase domain and WD repeat-containing protein 1 |
| Q96FQ6 | S100A16 | Protein S100-A16 |
| Q96NU1 | SAMD11 | Sterile alpha motif domain-containing protein 11 |
| Q96QA5 | GSDMA | Gasdermin-A |
| Q99497 | PARK7 | Parkinson disease protein 7 |
| Q99536 | VAT1 | Synaptic vesicle membrane protein VAT-1 homolog |
| Q99758 | ABCA3 | ATP-binding cassette sub-family A member 3 |
| Q9HCY8 | S100A14 | Protein S100-A14 |
| Q9NQW6 | ANLN | Anillin |
| Q9NTM9 | CUTC | Copper homeostasis protein cutC homolog |
| Q9NYI0 | PSD3 | PH and SEC7 domain-containing protein 3 |
| Q9P0M6 | MACROH2A2 | Core histone macro-H2A.2 |
| Q9P2N2 | ARHGAP28 | Rho GTPase-activating protein 28 |
| Q9UBC9 | SPRR3 | Small proline-rich protein 3 |
| Q9UBG3 | CRNN | Cornulin |
| Q9UBN7 | HDAC6 | Histone deacetylase 6 |
| Q9UBX7 | KLK11 | Kallikrein-11 |
| Q9UGM5 | FETUB | Fetuin-B |
| Q9UKF2 | ADAM30 | Disintegrin and metalloproteinase domain-containing protein 30 |
| Q9UPN4 | CEP131 | Centrosomal protein of 131 kDa |
| Q9Y587 | AP4S1 | AP-4 complex subunit sigma-1 |

**Supplementary Table S4: Shared enamel matrix protein core: proteins common to both HSPM and MIH (n = 120 proteins) with functional annotations.**

| **Proteins Common to Both MIH & HSPM (n=120)** | | | |
| --- | --- | --- | --- |
| **UniProt Accession number** | **Gene Symbol** | **Protein Description** | **Functional Category** |
| A0A075B6R9 | IGKV2D-24 | Probable non-functional immunoglobulin kappa variable 2D-24 | Immune Protein (Immunoglobulin) |
| A0A087WW87 | IGKV2-40 | Immunoglobulin kappa variable 2-40 | Immune Protein (Immunoglobulin) |
| A0A0C4DH72 | IGKV1-6 | Immunoglobulin kappa variable 1-6 | Immune Protein (Immunoglobulin) |
| A0A0J9YXX1 | IGHV5-10-1 | Immunoglobulin heavy variable 5-10-1 | Immune Protein (Immunoglobulin) |
| B9A064 | IGLL5 | Immunoglobulin lambda-like polypeptide 5 | Immune Protein (Immunoglobulin) |
| O60882 | MMP20 | Matrix metalloproteinase-20 | Enzyme (Protease/MMP) |
| P00734 | F2 | Prothrombin | Enzyme (Protease) |
| P00751 | CFB | Complement factor B | Immune/Complement Protein |
| P01008 | SERPINC1 | Antithrombin-III | Protease Inhibitor |
| P01009 | SERPINA1 | Alpha-1-antitrypsin | Protease Inhibitor |
| P01011 | SERPINA3 | Alpha-1-antichymotrypsin | Protease Inhibitor |
| P01024 | C3 | Complement C3 | Immune/Complement Protein |
| P01036 | CST4 | Cystatin-S | Protease Inhibitor |
| P01042 | KNG1 | Kininogen-1 | Signaling/Regulatory Protein |
| P01593 | IGKV1D-33 | Immunoglobulin kappa variable 1D-33 | Immune Protein (Immunoglobulin) |
| P01599 | IGKV1-17 | Immunoglobulin kappa variable 1-17 | Immune Protein (Immunoglobulin) |
| P01619 | IGKV3-20 | Immunoglobulin kappa variable 3-20 | Immune Protein (Immunoglobulin) |
| P01742 | IGHV1-69 | Immunoglobulin heavy variable 1-69 | Immune Protein (Immunoglobulin) |
| P01763 | IGHV3-48 | Immunoglobulin heavy variable 3-48 | Immune Protein (Immunoglobulin) |
| P01833 | PIGR | Polymeric immunoglobulin receptor | Transport Protein |
| P01834 | IGKC | Immunoglobulin kappa constant | Immune Protein (Immunoglobulin) |
| P01857 | IGHG1 | Immunoglobulin heavy constant gamma 1 | Immune Protein (Immunoglobulin) |
| P01861 | IGHG4 | Immunoglobulin heavy constant gamma 4 | Immune Protein (Immunoglobulin) |
| P01876 | IGHA1 | Immunoglobulin heavy constant alpha 1 | Immune Protein (Immunoglobulin) |
| P01889 | HLA-B | HLA class I histocompatibility antigen, B alpha chain | Immune Protein (MHC) |
| P02452 | COL1A1 | Collagen alpha-1(I) chain | ECM Protein |
| P02533 | KRT14 | Keratin, type I cytoskeletal 14 | Structural Protein |
| P02538 | KRT6A | Keratin, type II cytoskeletal 6A | Structural Protein |
| P02647 | APOA1 | Apolipoprotein A-I | Transport Protein |
| P02656 | APOC3 | Apolipoprotein C-III | Transport Protein |
| P02671 | FGA | Fibrinogen alpha chain | Coagulation Protein |
| P02760 | AMBP | Protein AMBP | Protease Inhibitor / Transport Protein |
| P02763 | ORM1 | Alpha-1-acid glycoprotein 1 | Transport Protein |
| P02765 | AHSG | Alpha-2-HS-glycoprotein | Signaling/Regulatory Protein |
| P02766 | TTR | Transthyretin | Transport Protein |
| P02768 | ALB | Albumin | Transport Protein |
| P02774 | GC | Vitamin D-binding protein | Transport Protein |
| P02787 | TF | Serotransferrin | Transport Protein |
| P02788 | LTF | Lactotransferrin | Transport Protein |
| P02814 | SMR3B | Submaxillary gland androgen-regulated protein 3B | Structural Protein |
| P04004 | VTN | Vitronectin | ECM Protein |
| P04083 | ANXA1 | Annexin A1 | Signaling/Immunity Protein |
| P04196 | HRG | Histidine-rich glycoprotein | Transport Protein |
| P04259 | KRT6B | Keratin, type II cytoskeletal 6B | Structural Protein |
| P04264 | KRT1 | Keratin, type II cytoskeletal 1 | Structural Protein |
| P04406 | GAPDH | Glyceraldehyde-3-phosphate dehydrogenase | Enzyme (Metabolic) |
| P04745 | AMY1A | Alpha-amylase 1 OS=Homo sapiens | Enzyme (Digestive) |
| P04792 | HSPB1 | Heat shock protein beta-1 | Chaperone |
| P05090 | APOD | Apolipoprotein D | Transport Protein |
| P05109 | S100A8 | Protein S100-A8 | Signaling/Immunity Protein |
| P05154 | SERPINA5 | Plasma serine protease inhibitor | Protease Inhibitor |
| P05155 | SERPING1 | Plasma protease C1 inhibitor | Protease Inhibitor |
| P05787 | KRT8 | Keratin, type II cytoskeletal 8 | Structural Protein |
| P06331 | LOC100289944; IGHV4-34 | Immunoglobulin heavy variable 4-34 | Immune Protein (Immunoglobulin) |
| P06702 | S100A9 | Protein S100-A9 | Signaling/Immunity Protein |
| P06870 | KLK1 | Kallikrein-1 | Enzyme (Protease) |
| P07355 | ANXA2 | Annexin A2 | Signaling/Immunity Protein |
| P07602 | PSAP | Prosaposin | Enzyme (Lysosomal) |
| P08123 | COL1A2 | Collagen alpha-2(I) chain | ECM Protein |
| P08670 | VIM | Vimentin | Structural Protein |
| P08697 | SERPINF2 | Alpha-2-antiplasmin | Protease Inhibitor |
| P08779 | KRT16 | Keratin, type I cytoskeletal 16 | Structural Protein |
| P0DOY2 | IGLC2 | Immunoglobulin lambda constant 2 | Immune Protein (Immunoglobulin) |
| P0DP04 | IGHV3-43D | Immunoglobulin heavy variable 3-43D | Immune Protein (Immunoglobulin) |
| P10599 | TXN | Thioredoxin | Enzyme (Redox) |
| P10909 | CLU | Clusterin | Chaperone |
| P12273 | PIP | Prolactin-inducible protein | Signaling/Regulatory Protein |
| P13645 | KRT10 | Keratin, type I cytoskeletal 10 | Structural Protein |
| P13646 | KRT13 | Keratin, type I cytoskeletal 13 | Structural Protein |
| P13647 | KRT5 | Keratin, type II cytoskeletal 5 | Structural Protein |
| P13796 | LCP1 | Plastin-2 | Structural Protein |
| P13942 | COL11A2 | Collagen alpha-2(XI) chain | ECM Protein |
| P14923 | JUP | Junction plakoglobin | Structural Protein |
| P15924 | DSP | Desmoplakin | Structural Protein |
| P19013 | KRT4 | Keratin, type II cytoskeletal 4 | Structural Protein |
| P23083 | IGHV1OR15-1 | Immunoglobulin heavy variable 1-2 | Immune Protein (Immunoglobulin) |
| P25311 | AZGP1 | Zinc-alpha-2-glycoprotein | Signaling/Regulatory Protein |
| P30740 | SERPINB1 | Leukocyte elastase inhibitor | Protease Inhibitor |
| P31146 | CORO1A | Coronin-1A | Structural Protein |
| P31151 | S100A7 | Protein S100-A7 | Signaling/Immunity Protein |
| P31944 | CASP14 | Caspase-14 | Enzyme (Protease) |
| P31949 | S100A11 | Protein S100-A11 | Signaling/Immunity Protein |
| P35527 | KRT9 | Keratin, type I cytoskeletal 9 | Structural Protein |
| P35908 | KRT2 | Keratin, type II cytoskeletal 2 epidermal | Structural Protein |
| P36955 | SERPINF1 | Pigment epithelium-derived factor | Protease Inhibitor |
| P39900 | MMP12 | Macrophage metalloelastase | Enzyme (Protease/MMP) |
| P47929 | LGALS7 | Galectin-7 | Signaling/Regulatory Protein |
| P59665 | DEFA1 | Neutrophil defensin 1 | Antimicrobial Peptide |
| P60709 | ACTB | Actin, cytoplasmic 1 | Structural Protein |
| P61626 | LYZ | Lysozyme C | Enzyme (Antimicrobial) |
| P61769 | B2M | Beta-2-microglobulin | Immune Protein (MHC) |
| P62987 | UBA52 | Ubiquitin-60S ribosomal protein L40 | Structural Protein |
| P68871 | HBB | Hemoglobin subunit beta | Transport Protein |
| P69905 | HBA1 | Hemoglobin subunit alpha | Transport Protein |
| P81605 | DCD | Dermcidin | Antimicrobial Peptide |
| Q01469 | FABP5 | Fatty acid-binding protein 5 | Transport Protein |
| Q02413 | DSG1 | Desmoglein-1 | Cell Adhesion Protein |
| Q04695 | KRT17 | Keratin, type I cytoskeletal 17 | Structural Protein |
| Q08188 | TGM3 | Protein-glutamine gamma-glutamyltransferase E | Enzyme (Crosslinking) |
| Q13753 | LAMC2 | Laminin subunit gamma-2 | ECM Protein |
| Q13835 | PKP1 | Plakophilin-1 | Structural Protein |
| Q15113 | PCOLCE | Procollagen C-endopeptidase enhancer 1 | ECM Protein |
| Q15517 | CDSN | Corneodesmosin | Structural Protein |
| Q16777 | HIST2H2AC | Histone H2A type 2-C | Structural Protein |
| Q5D862 | FLG2 | Filaggrin-2 | Structural Protein |
| Q5T749 | KPRP | Keratinocyte proline-rich protein | Structural Protein |
| Q6P5S2 | C6orf58 | Protein LEG1 homolog | Immune Protein |
| Q71UI9 | H2AFV | Histone H2A.V | Structural Protein |
| Q7RTS7 | KRT74 | Keratin, type II cytoskeletal 74 | Structural Protein |
| Q86YZ3 | HRNR | Hornerin | Structural Protein |
| Q8N1N4 | KRT78 | Keratin, type II cytoskeletal 78 | Structural Protein |
| Q8NEV8 | EXPH5 | Exophilin-5 | Transport Protein |
| Q96DA0 | ZG16B | Zymogen granule protein 16 homolog B | Immune/Lectin Protein |
| Q96P63 | SERPINB12 | Serpin B12 | Protease Inhibitor |
| Q9NP70 | AMBN | Ameloblastin | ECM Protein |
| Q9NRN5 | OLFML3 | Olfactomedin-like protein 3 | ECM Protein |
| Q9NZW4 | DSPP | Dentin sialophosphoprotein | ECM Protein |
| Q9UGM3 | DMBT1 | Deleted in malignant brain tumors 1 protein | Immune Protein |
| Q9UMD9 | COL17A1 | Collagen alpha-1(XVII) chain | ECM Protein |
| Q9Y5K2 | KLK4 | Kallikrein-4 | Enzyme (Protease) |

**Supplementary Table S5: Protein stratification based on log₂-transformed mean abundance**

| **Accession no.** | **Description** | **HSPM_mean** | **MIH_mean** | **log2 HSPM** | **log2MIH** | **Deltalog2** | **Category** |
| --- | --- | --- | --- | --- | --- | --- | --- |
| P02768 | Albumin | 3.88E+09 | 2.69E+09 | 31.85299 | 31.3262 | 0.526797 | Shared core |
| P13645 | Keratin, type I cytoskeletal 10 | 2.15E+08 | 7.48E+08 | 27.67945 | 29.47942 | -1.79996 | MIH-enriched |
| P04264 | Keratin, type II cytoskeletal 1 | 2.47E+08 | 9.94E+08 | 27.88253 | 29.88824 | -2.00571 | MIH-enriched |
| P35908 | Keratin, type II cytoskeletal 2 epidermal | 1.05E+08 | 2.8E+08 | 26.65258 | 28.05832 | -1.40575 | MIH-enriched |
| P35527 | Keratin, type I cytoskeletal 9 | 82221593 | 1.26E+09 | 26.29301 | 30.22978 | -3.93676 | MIH-enriched |
| P01009 | Alpha-1-antitrypsin | 6.99E+08 | 63002421 | 29.38029 | 25.9089 | 3.471385 | HSPM-enriched |
| P01008 | Antithrombin-III | 91037059 | 15184130 | 26.43995 | 23.85606 | 2.58389 | HSPM-enriched |
| P02787 | Serotransferrin | 33395112 | 3810366 | 24.99313 | 21.8615 | 3.131636 | HSPM-enriched |
| P02765 | Alpha-2-HS-glycoprotein | 1.47E+08 | 13795180 | 27.13502 | 23.71766 | 3.417363 | HSPM-enriched |
| P04259 | Keratin, type II cytoskeletal 6B | 2752984 | 441361.1 | 21.39256 | 18.7516 | 2.640965 | HSPM-enriched |
| P02538 | Keratin, type II cytoskeletal 6A | 1541136 | 32625133 | 20.55556 | 24.95948 | -4.40392 | MIH-enriched |
| P01011 | Alpha-1-antichymotrypsin | 67418353 | 19799883 | 26.00664 | 24.23899 | 1.767649 | HSPM-enriched |
| P04745 | Alpha-amylase 1 | 23108111 | 5616875 | 24.4619 | 22.42134 | 2.04056 | HSPM-enriched |
| P08779 | Keratin, type I cytoskeletal 16 | 12477827 | 7632710 | 23.57286 | 22.86376 | 0.7091 | Shared core |
| P13647 | Keratin, type II cytoskeletal 5 | 11808499 | 20086205 | 23.49332 | 24.2597 | -0.76638 | Shared core |
| P02533 | Keratin, type I cytoskeletal 14 | 4860168 | 18080229 | 22.21257 | 24.10791 | -1.89533 | MIH-enriched |
| O60882 | Matrix metalloproteinase-20 | 37209143 | 883227.2 | 25.14915 | 19.75243 | 5.396729 | HSPM-enriched |
| P06702 | Protein S100-A9 | 1.17E+08 | 3725458 | 26.80642 | 21.82899 | 4.977432 | HSPM-enriched |
| P08123 | Collagen alpha-2(I) chain | 1.48E+08 | 20642915 | 27.14045 | 24.29914 | 2.84131 | HSPM-enriched |
| P01024 | Complement C3 | 9504571 | 1732225 | 23.18019 | 20.7242 | 2.455995 | HSPM-enriched |
| P30740 | Leukocyte elastase inhibitor | 7788269 | 1636130 | 22.89287 | 20.64186 | 2.251015 | HSPM-enriched |
| P02766 | Transthyretin | 28932284 | 1847206 | 24.78618 | 20.81691 | 3.969264 | HSPM-enriched |
| P02452 | Collagen alpha-1(I) chain | 89483739 | 955757.9 | 26.41512 | 19.86629 | 6.548837 | HSPM-enriched |
| P68871 | Hemoglobin subunit beta | 31480300 | 1785129 | 24.90795 | 20.7676 | 4.140349 | HSPM-enriched |
| P15924 | Desmoplakin | 944263.6 | 9044524 | 19.84883 | 23.10861 | -3.25978 | MIH-enriched |
| P01857 | Immunoglobulin heavy constant gamma 1 | 1.09E+08 | 9740982 | 26.69568 | 23.21564 | 3.480039 | HSPM-enriched |
| P02647 | Apolipoprotein A-I | 16003914 | 250840.9 | 23.93192 | 17.93641 | 5.995508 | HSPM-enriched |
| Q15113 | Procollagen C-endopeptidase enhancer 1 | 6568412 | 520654.1 | 22.64711 | 18.98997 | 3.657147 | HSPM-enriched |
| P69905 | Hemoglobin subunit alpha | 14497731 | 521058.2 | 23.78932 | 18.99109 | 4.798239 | HSPM-enriched |
| P01834 | Immunoglobulin kappa constant | 51810313 | 8346125 | 25.62674 | 22.99268 | 2.634061 | HSPM-enriched |
| P05109 | Protein S100-A8 | 43414036 | 6855846 | 25.37166 | 22.7089 | 2.662755 | HSPM-enriched |
| P36955 | Pigment epithelium-derived factor | 15508835 | 359733.7 | 23.88659 | 18.45657 | 5.430017 | HSPM-enriched |
| P02774 | Vitamin D-binding protein | 9171369 | 432648.6 | 23.12871 | 18.72284 | 4.405869 | HSPM-enriched |
| P08670 | Vimentin | 3111041 | 21241022 | 21.56897 | 24.34035 | -2.77138 | MIH-enriched |
| P0DOY2 | Immunoglobulin lambda constant 2 | 34821400 | 10249872 | 25.05347 | 23.2891 | 1.764368 | HSPM-enriched |
| P13942 | Collagen alpha-2(XI) chain | 27994053 | 1154200 | 24.73862 | 20.13846 | 4.600155 | HSPM-enriched |
| P02763 | Alpha-1-acid glycoprotein 1 | 13714700 | 218902.1 | 23.70922 | 17.73993 | 5.969293 | HSPM-enriched |
| Q04695 | Keratin, type I cytoskeletal 17 | 965373.7 | 3730313 | 19.88073 | 21.83087 | -1.95014 | MIH-enriched |
| P00734 | Prothrombin | 7101888 | 1347199 | 22.75977 | 20.36153 | 2.39824 | HSPM-enriched |
| P02788 | Lactotransferrin | 1481316 | 181776.3 | 20.49845 | 17.4718 | 3.026644 | HSPM-enriched |
| P14923 | Junction plakoglobin | 1667440 | 88271.01 | 20.6692 | 16.42965 | 4.239552 | HSPM-enriched |
| P04004 | Vitronectin | 13698571 | 240034.7 | 23.70752 | 17.87288 | 5.834638 | HSPM-enriched |
| Q86YZ3 | Hornerin | 936142.1 | 47484774 | 19.83637 | 25.50096 | -5.66459 | MIH-enriched |
| P01023 | Alpha-2-macroglobulin | 893998 | 52863.01 | 19.76991 | 15.68997 | 4.079941 | HSPM-enriched |
| Q9NP70 | Ameloblastin | 4.47E+08 | 4.38E+08 | 28.73703 | 28.70794 | 0.029092 | Shared core |
| Q9NZW4 | Dentin sialophosphoprotein | 34839422 | 5027275 | 25.05422 | 22.26135 | 2.792872 | HSPM-enriched |
| P61626 | Lysozyme C | 1.16E+08 | 19555475 | 26.79209 | 24.22107 | 2.571026 | HSPM-enriched |
| Q9Y5K2 | Kallikrein-4 | 37807014 | 25166769 | 25.17215 | 24.58502 | 0.587134 | Shared core |
| P10909 | Clusterin | 4177969 | 630816.3 | 21.99437 | 19.26686 | 2.72751 | HSPM-enriched |
| P01861 | Immunoglobulin heavy constant gamma 4 | 5758394 | 190333.1 | 22.45724 | 17.53817 | 4.919068 | HSPM-enriched |
| P61769 | Beta-2-microglobulin | 13247988 | 1647701 | 23.65927 | 20.65202 | 3.007247 | HSPM-enriched |
| P31151 | Protein S100-A7 | 1646215 | 1298286 | 20.65072 | 20.30818 | 0.342544 | Shared core |
| P60709 | Actin, cytoplasmic 1 | 1836274 | 18285231 | 20.80835 | 24.12418 | -3.31583 | MIH-enriched |
| P25311 | Zinc-alpha-2-glycoprotein | 6035718 | 2738921 | 22.52509 | 21.38518 | 1.139918 | HSPM-enriched |
| P02814 | Submaxillary gland androgen-regulated protein 3B | 4824643 | 1709403 | 22.20199 | 20.70506 | 1.49693 | HSPM-enriched |
| P19013 | Keratin, type II cytoskeletal 4 | 66993.87 | 64507630 | 16.03174 | 25.94297 | -9.91123 | MIH-enriched |
| P12273 | Prolactin-inducible protein | 4499308 | 2537734 | 22.10127 | 21.27511 | 0.826162 | Shared core |
| Q02413 | Desmoglein-1 | 484719.3 | 4459987 | 18.88679 | 22.08861 | -3.20182 | MIH-enriched |
| Q9UMD9 | Collagen alpha-1(XVII) chain | 1047370 | 96854.4 | 19.99834 | 16.56353 | 3.43481 | HSPM-enriched |
| Q8N1N4 | Keratin, type II cytoskeletal 78 | 188822.9 | 1694381 | 17.52667 | 20.69233 | -3.16565 | MIH-enriched |
| P08697 | Alpha-2-antiplasmin | 1674595 | 114796 | 20.67538 | 16.80871 | 3.866668 | HSPM-enriched |
| P08493 | Matrix Gla protein | 2376150 | 117956.9 | 21.18019 | 16.8479 | 4.332293 | HSPM-enriched |
| P07602 | Prosaposin | 883239.3 | 194618.2 | 19.75244 | 17.57029 | 2.182158 | HSPM-enriched |
| P81605 | Dermcidin | 7502339 | 7.51E+08 | 22.83891 | 29.48385 | -6.64494 | MIH-enriched |
| Q86Y46 | Keratin, type II cytoskeletal 73 | 1581505 | 5215092 | 20.59287 | 22.31426 | -1.72139 | MIH-enriched |
| P01619 | Immunoglobulin kappa variable 3-20 | 10035564 | 406490.4 | 23.25862 | 18.63286 | 4.625757 | HSPM-enriched |
| P31944 | Caspase-14 | 104702.5 | 6710678 | 16.67594 | 22.67803 | -6.00209 | MIH-enriched |
| P07355 | Annexin A2 | 1027627 | 2641533 | 19.97088 | 21.33294 | -1.36206 | MIH-enriched |
| P31146 | Coronin-1A | 1736640 | 400264.2 | 20.72787 | 18.61059 | 2.117274 | HSPM-enriched |
| P59665 | Neutrophil defensin 1 | 1.62E+08 | 1.17E+08 | 27.2687 | 26.80001 | 0.468687 | Shared core |
| P06331 | Immunoglobulin heavy variable 4-34 | 7672036 | 262373 | 22.87118 | 18.00126 | 4.869919 | HSPM-enriched |
| Q16777 | Histone H2A type 2-C | 365852.2 | 54656672 | 18.4809 | 25.70389 | -7.22299 | MIH-enriched |
| P01593 | Immunoglobulin kappa variable 1D-33 | 1285603 | 527715.4 | 20.29401 | 19.0094 | 1.284613 | HSPM-enriched |
| P02656 | Apolipoprotein C-III | 1793739 | 88110.04 | 20.77454 | 16.42702 | 4.34752 | HSPM-enriched |
| P0DP04 | Immunoglobulin heavy variable 3-43D | 263821.5 | 188813 | 18.0092 | 17.5266 | 0.482604 | Shared core |
| P80748 | Immunoglobulin lambda variable 3-21 | 1612601 | 185885.8 | 20.62096 | 17.50406 | 3.116901 | HSPM-enriched |
| Q08188 | Protein-glutamine gamma-glutamyltransferase E | 180507.5 | 1774099 | 17.4617 | 20.75865 | -3.29696 | MIH-enriched |
| Q13753 | Laminin subunit gamma-2 | 478902.2 | 643882 | 18.86937 | 19.29644 | -0.42707 | Shared core |
| P04083 | Annexin A1 | 41150.4 | 24073941 | 15.32862 | 24.52097 | -9.19235 | MIH-enriched |
| A0A087WW87 | Immunoglobulin kappa variable 2-40 | 2632007 | 813095.7 | 21.32773 | 19.63307 | 1.694666 | HSPM-enriched |
| Q9NRN5 | Olfactomedin-like protein 3 | 504452.8 | 155251.4 | 18.94436 | 17.24425 | 1.700113 | HSPM-enriched |
| P62987 | Ubiquitin-60S ribosomal protein L40 | 1025025 | 2059570 | 19.96723 | 20.97391 | -1.00668 | MIH-enriched |
| P02671 | Fibrinogen alpha chain | 433057.2 | 821005.1 | 18.7242 | 19.64703 | -0.92283 | Shared core |
| P01599 | Immunoglobulin kappa variable 1-17 | 350661.6 | 121344.5 | 18.41972 | 16.88875 | 1.530971 | HSPM-enriched |
| Q9NS15 | Latent-transforming growth factor beta-binding protein 3 | 329701.5 | 81299.28 | 18.3308 | 16.31096 | 2.019846 | HSPM-enriched |
| Q5T749 | Keratinocyte proline-rich protein | 131869.8 | 4093385 | 17.00875 | 21.96486 | -4.95611 | MIH-enriched |
| P20930 | Filaggrin | 230290.1 | 872776.4 | 17.81309 | 19.73525 | -1.92216 | MIH-enriched |
| P10599 | Thioredoxin | 460816.5 | 5763360 | 18.81383 | 22.45848 | -3.64465 | MIH-enriched |
| A0A075B6R9 | Probable non-functional immunoglobulin kappa variable 2D-24 | 115580.4 | 362111.9 | 16.81854 | 18.46608 | -1.64754 | MIH-enriched |
| P01742 | Immunoglobulin heavy variable 1-69 | 263821.5 | 415074.4 | 18.0092 | 18.66301 | -0.65381 | Shared core |

**Supplementary Table S6: Complete differential abundance statistics for all 90 common enamel matrix proteins**

| **No.** | **Protein Name** | **HSPM Mean log₂ Abundance** | **MIH Mean log₂ Abundance** | **log₂FC (HSPM/MIH)** | **Fold Change (HSPM/MIH) ×** | **p-value (Welch)** | **FDR (BH)** | **−log₁₀ (p-value)** | **Sig. (FDR<0.05)** | **Direction** |
| --- | --- | --- | --- | --- | --- | --- | --- | --- | --- | --- |
| 1 | Immunoglobulin heavy constant gamma 1 | 26.559 | 19.103 | **7.4568** | **175.68** | 2.45e-03 | 0.0079 | 2.61 | ****** | **▲ Higher in HSPM** |
| 2 | Collagen alpha-1(I) chain | 26.313 | 19.353 | **6.9596** | **124.47** | 7.17e-06 | 0.0003 | 5.145 | ******* | **▲ Higher in HSPM** |
| 3 | Apolipoprotein A-I | 23.57 | 16.85 | **6.7203** | **105.44** | 2.58e-05 | 0.0005 | 4.589 | ******* | **▲ Higher in HSPM** |
| 4 | Alpha-1-acid glycoprotein 1 | 23.588 | 16.893 | **6.6958** | **103.67** | 3.96e-05 | 0.0005 | 4.402 | ******* | **▲ Higher in HSPM** |
| 5 | Vitronectin | 23.439 | 16.744 | **6.6946** | **103.58** | 3.81e-05 | 0.0005 | 4.419 | ******* | **▲ Higher in HSPM** |
| 6 | Immunoglobulin heavy variable 4-34 | 22.735 | 16.335 | **6.4003** | **84.46** | 3.36e-04 | 0.0022 | 3.474 | ****** | **▲ Higher in HSPM** |
| 7 | Collagen alpha-2(XI) chain | 24.535 | 18.36 | **6.1754** | **72.28** | 2.63e-03 | 0.0079 | 2.58 | ****** | **▲ Higher in HSPM** |
| 8 | Pigment epithelium-derived factor | 23.801 | 17.8 | **6.0016** | **64.07** | 9.10e-05 | 0.0009 | 4.041 | ******* | **▲ Higher in HSPM** |
| 9 | Alpha-1-antitrypsin | 29.214 | 23.444 | **5.7697** | **54.56** | 4.79e-03 | 0.0135 | 2.319 | ***** | **▲ Higher in HSPM** |
| 10 | Matrix metalloproteinase-20 | 24.97 | 19.253 | **5.7164** | **52.58** | 3.26e-05 | 0.0005 | 4.486 | ******* | **▲ Higher in HSPM** |
| 11 | Immunoglobulin kappa variable 3-20 | 23.177 | 17.668 | **5.509** | **45.54** | 2.38e-04 | 0.0021 | 3.624 | ****** | **▲ Higher in HSPM** |
| 12 | Protein S100-A9 | 26.322 | 20.896 | **5.4259** | **42.99** | 4.16e-04 | 0.0023 | 3.381 | ****** | **▲ Higher in HSPM** |
| 13 | Vitamin D-binding protein | 22.685 | 17.58 | **5.1051** | **34.42** | 3.44e-04 | 0.0022 | 3.463 | ****** | **▲ Higher in HSPM** |
| 14 | Transthyretin | 24.753 | 19.652 | **5.101** | **34.32** | 1.33e-03 | 0.0052 | 2.877 | ****** | **▲ Higher in HSPM** |
| 15 | Hemoglobin subunit alpha | 23.163 | 18.296 | **4.8667** | **29.18** | 7.15e-04 | 0.0032 | 3.146 | ****** | **▲ Higher in HSPM** |
| 16 | Alpha-2-HS-glycoprotein | 27.051 | 22.392 | **4.6591** | **25.26** | 4.55e-03 | 0.0132 | 2.342 | ***** | **▲ Higher in HSPM** |
| 17 | Matrix Gla protein | 21.058 | 16.402 | **4.6566** | **25.22** | 2.59e-04 | 0.0021 | 3.586 | ****** | **▲ Higher in HSPM** |
| 18 | Immunoglobulin heavy constant gamma 4 | 21.765 | 17.208 | **4.5571** | **23.54** | 9.75e-03 | 0.0251 | 2.011 | ***** | **▲ Higher in HSPM** |
| 19 | Immunoglobulin kappa constant | 25.44 | 21.014 | **4.4259** | **21.5** | 1.12e-02 | 0.0263 | 1.949 | ***** | **▲ Higher in HSPM** |
| 20 | Antithrombin-III | 26.425 | 22.254 | **4.1709** | **18.01** | 7.04e-03 | 0.0189 | 2.152 | ***** | **▲ Higher in HSPM** |
| 21 | Hemoglobin subunit beta | 24.254 | 20.164 | **4.0894** | **17.02** | 1.86e-03 | 0.0067 | 2.73 | ****** | **▲ Higher in HSPM** |
| 22 | Serotransferrin | 24.91 | 20.848 | **4.0617** | **16.7** | 2.55e-03 | 0.0079 | 2.593 | ****** | **▲ Higher in HSPM** |
| 23 | Procollagen C-endopeptidase enhancer 1 | 22.509 | 18.482 | **4.0269** | **16.3** | 4.64e-04 | 0.0025 | 3.334 | ****** | **▲ Higher in HSPM** |
| 24 | Prothrombin | 22.7 | 18.836 | **3.8639** | **14.56** | 1.59e-02 | 0.034 | 1.799 | ***** | **▲ Higher in HSPM** |
| 25 | Immunoglobulin lambda variable 3-21 | 20.587 | 16.891 | **3.6963** | **12.96** | 9.60e-04 | 0.0041 | 3.018 | ****** | **▲ Higher in HSPM** |
| 26 | Immunoglobulin kappa variable 2-40 | 20.939 | 17.27 | **3.6689** | **12.72** | 1.36e-02 | 0.0299 | 1.865 | ***** | **▲ Higher in HSPM** |
| 27 | Collagen alpha-1(XVII) chain | 19.913 | 16.743 | **3.1701** | **9** | 2.09e-06 | 0.0002 | 5.68 | ******* | **▲ Higher in HSPM** |
| 28 | Beta-2-microglobulin | 23.619 | 20.453 | **3.1658** | **8.97** | 7.89e-05 | 0.0009 | 4.103 | ******* | **▲ Higher in HSPM** |
| 29 | Lactotransferrin | 19.939 | 16.845 | **3.0938** | **8.54** | 1.28e-02 | 0.0288 | 1.893 | ***** | **▲ Higher in HSPM** |
| 30 | Clusterin | 21.368 | 18.339 | **3.0289** | **8.16** | 1.05e-02 | 0.0259 | 1.981 | ***** | **▲ Higher in HSPM** |
| 31 | Collagen alpha-2(I) chain | 27.085 | 24.118 | **2.967** | **7.82** | 3.28e-05 | 0.0005 | 4.484 | ******* | **▲ Higher in HSPM** |
| 32 | Alpha-1-antichymotrypsin | 25.906 | 23.005 | **2.9012** | **7.47** | 1.89e-02 | 0.0392 | 1.724 | ***** | **▲ Higher in HSPM** |
| 33 | Alpha-2-macroglobulin | 18.622 | 15.837 | **2.7855** | **6.89** | 2.50e-02 | 0.0488 | 1.603 | ***** | **▲ Higher in HSPM** |
| 34 | Dentin sialophosphoprotein | 24.762 | 22.066 | **2.6963** | **6.48** | 3.31e-04 | 0.0022 | 3.48 | ****** | **▲ Higher in HSPM** |
| 35 | Lysozyme C | 26.524 | 23.863 | **2.6617** | **6.33** | 2.27e-03 | 0.0077 | 2.643 | ****** | **▲ Higher in HSPM** |
| 36 | Keratin, type II cytoskeletal 6B | 20.888 | 18.336 | **2.5523** | **5.87** | 1.07e-02 | 0.0259 | 1.972 | ***** | **▲ Higher in HSPM** |
| 37 | Complement C3 | 22.542 | 20.26 | **2.282** | **4.86** | 1.96e-02 | 0.0392 | 1.708 | ***** | **▲ Higher in HSPM** |
| 38 | Immunoglobulin kappa variable 1-17 | 18.283 | 16.913 | **1.3697** | **2.58** | 1.93e-02 | 0.0392 | 1.714 | ***** | **▲ Higher in HSPM** |
| 39 | Desmoplakin | 19.503 | 22.386 | **-2.8832** | **7.38× (in MIH)** | 1.14e-02 | 0.0263 | 1.943 | ***** | **▼ Higher in MIH** |
| 40 | Desmoglein-1 | 18.654 | 21.684 | **-3.0298** | **8.17× (in MIH)** | 1.87e-03 | 0.0067 | 2.727 | ****** | **▼ Higher in MIH** |
| 41 | Keratin, type I cytoskeletal 9 | 26.054 | 29.632 | **-3.5779** | **11.94× (in MIH)** | 2.31e-03 | 0.0077 | 2.636 | ****** | **▼ Higher in MIH** |
| 42 | Keratinocyte proline-rich protein | 16.521 | 21.502 | **-4.9813** | **31.59× (in MIH)** | 6.92e-04 | 0.0032 | 3.16 | ****** | **▼ Higher in MIH** |
| 43 | Annexin A1 | 15.623 | 20.925 | **-5.3021** | **39.45× (in MIH)** | 7.13e-03 | 0.0189 | 2.147 | ***** | **▼ Higher in MIH** |
| 44 | Hornerin | 19.404 | 24.736 | **-5.3317** | **40.27× (in MIH)** | 1.08e-03 | 0.0044 | 2.969 | ****** | **▼ Higher in MIH** |
| 45 | Dermcidin | 21.998 | 28.363 | **-6.3657** | **82.46× (in MIH)** | 6.09e-04 | 0.003 | 3.215 | ****** | **▼ Higher in MIH** |
| 46 | Histone H2A type 2-C | 18.111 | 24.516 | **-6.4051** | **84.75× (in MIH)** | 3.65e-04 | 0.0022 | 3.438 | ****** | **▼ Higher in MIH** |
| 47 | Ameloblastin | 28.548 | 23.508 | 5.04 | 32.8988 | 9.99e-02 | 0.1405 | 1 | ns | — Not significant |
| 48 | Neutrophil defensin 1 | 26.068 | 21.222 | 4.846 | 28.761 | 4.26e-02 | 0.0737 | 1.371 | ns | — Not significant |
| 49 | Apolipoprotein C-III | 19.728 | 16.302 | 3.4263 | 10.7505 | 5.23e-02 | 0.0841 | 1.281 | ns | — Not significant |
| 50 | Junction plakoglobin | 19.722 | 16.596 | 3.1254 | 8.7262 | 9.96e-02 | 0.1405 | 1.002 | ns | — Not significant |
| 51 | Alpha-2-antiplasmin | 19.728 | 16.753 | 2.9758 | 7.8668 | 3.34e-02 | 0.0639 | 1.477 | ns | — Not significant |
| 52 | Immunoglobulin lambda constant 2 | 24.686 | 21.74 | 2.9457 | 7.7046 | 4.21e-02 | 0.0737 | 1.376 | ns | — Not significant |
| 53 | Leukocyte elastase inhibitor | 22.02 | 19.368 | 2.6513 | 6.2822 | 4.74e-02 | 0.0805 | 1.324 | ns | — Not significant |
| 54 | Submaxillary gland androgen-regulated protein 3B | 21.577 | 19.077 | 2.4997 | 5.6556 | 7.98e-02 | 0.1177 | 1.098 | ns | — Not significant |
| 55 | Protein S100-A8 | 24.394 | 22.064 | 2.3304 | 5.0294 | 5.23e-02 | 0.0841 | 1.281 | ns | — Not significant |
| 56 | Prosaposin | 19.287 | 17.123 | 2.164 | 4.4817 | 3.50e-02 | 0.0655 | 1.456 | ns | — Not significant |
| 57 | Albumin | 31.845 | 29.839 | 2.0061 | 4.0171 | 8.87e-02 | 0.1287 | 1.052 | ns | — Not significant |
| 58 | Immunoglobulin kappa variable 1D-33 | 20.052 | 18.231 | 1.8211 | 3.5335 | 5.35e-02 | 0.0844 | 1.272 | ns | — Not significant |
| 59 | Coronin-1A | 19.564 | 17.748 | 1.8164 | 3.522 | 1.77e-01 | 0.2313 | 0.751 | ns | — Not significant |
| 60 | Zinc-alpha-2-glycoprotein | 22.43 | 20.734 | 1.6957 | 3.2393 | 6.61e-02 | 0.0991 | 1.18 | ns | — Not significant |
| 61 | Prolactin-inducible protein | 21.9 | 20.225 | 1.675 | 3.1931 | 1.06e-01 | 0.1451 | 0.973 | ns | — Not significant |
| 62 | Olfactomedin-like protein 3 | 18.606 | 17.116 | 1.4897 | 2.8083 | 1.61e-01 | 0.2137 | 0.792 | ns | — Not significant |
| 63 | Protein S100-A7 | 19.657 | 18.228 | 1.4291 | 2.6928 | 3.31e-01 | 0.3883 | 0.48 | ns | — Not significant |
| 64 | Latent-transforming growth factor beta-binding protein 3 | 17.661 | 16.374 | 1.287 | 2.4402 | 2.01e-01 | 0.2514 | 0.697 | ns | — Not significant |
| 65 | Keratin, type I cytoskeletal 16 | 23.296 | 22.363 | 0.933 | 1.9092 | 2.72e-01 | 0.335 | 0.566 | ns | — Not significant |
| 66 | Immunoglobulin heavy variable 3-43D | 17.557 | 16.713 | 0.8447 | 1.7959 | 4.32e-01 | 0.4865 | 0.364 | ns | — Not significant |
| 67 | Alpha-amylase 1 | 22.213 | 21.648 | 0.5659 | 1.4803 | 6.72e-01 | 0.6947 | 0.173 | ns | — Not significant |
| 68 | Immunoglobulin heavy variable 1-69 | 17.557 | 17.019 | 0.5382 | 1.4521 | 6.50e-01 | 0.6903 | 0.187 | ns | — Not significant |
| 69 | Ubiquitin-60S ribosomal protein L40 | 19.894 | 19.364 | 0.5304 | 1.4443 | 6.52e-01 | 0.6903 | 0.186 | ns | — Not significant |
| 70 | Kallikrein-4 | 25.016 | 24.523 | 0.4933 | 1.4076 | 1.84e-01 | 0.2359 | 0.736 | ns | — Not significant |
| 71 | Annexin A2 | 19.315 | 19.178 | 0.1367 | 1.0994 | 9.20e-01 | 0.9303 | 0.036 | ns | — Not significant |
| 72 | Keratin, type II cytoskeletal 73 | 20.31 | 20.21 | 0.1002 | 1.072 | 9.52e-01 | 0.9515 | 0.022 | ns | — Not significant |
| 73 | Fibrinogen alpha chain | 18.564 | 18.907 | -0.3431 | 0.7883 | 6.71e-01 | 0.6947 | 0.173 | ns | — Not significant |
| 74 | Laminin subunit gamma-2 | 18.775 | 19.176 | -0.4016 | 0.757 | 3.88e-01 | 0.4417 | 0.411 | ns | — Not significant |
| 75 | Keratin, type II cytoskeletal 5 | 23.221 | 23.629 | -0.4079 | 0.7537 | 6.37e-01 | 0.6902 | 0.196 | ns | — Not significant |
| 76 | Actin, cytoplasmic 1 | 19.843 | 20.534 | -0.6909 | 0.6195 | 7.15e-01 | 0.7315 | 0.146 | ns | — Not significant |
| 77 | Probable non-functional immunoglobulin kappa variable 2D-24 | 16.584 | 17.347 | -0.7629 | 0.5893 | 5.29e-01 | 0.5874 | 0.277 | ns | — Not significant |
| 78 | Filaggrin | 17.727 | 18.836 | -1.1087 | 0.4637 | 3.12e-01 | 0.3738 | 0.507 | ns | — Not significant |
| 79 | Thioredoxin | 18.469 | 19.586 | -1.1165 | 0.4612 | 5.72e-01 | 0.6278 | 0.243 | ns | — Not significant |
| 80 | Vimentin | 21.051 | 22.315 | -1.2634 | 0.4166 | 3.73e-01 | 0.4307 | 0.428 | ns | — Not significant |
| 81 | Keratin, type I cytoskeletal 14 | 21.983 | 23.264 | -1.2809 | 0.4115 | 2.00e-01 | 0.2514 | 0.699 | ns | — Not significant |
| 82 | Protein-glutamine gamma-glutamyltransferase E | 17.099 | 18.555 | -1.4563 | 0.3644 | 2.86e-01 | 0.3475 | 0.544 | ns | — Not significant |
| 83 | Keratin, type II cytoskeletal 2 epidermal | 26.106 | 27.625 | -1.5184 | 0.3491 | 1.05e-01 | 0.1451 | 0.979 | ns | — Not significant |
| 84 | Keratin, type I cytoskeletal 10 | 27.228 | 28.997 | -1.7694 | 0.2933 | 5.44e-02 | 0.0844 | 1.264 | ns | — Not significant |
| 85 | Keratin, type II cytoskeletal 1 | 27.587 | 29.413 | -1.8261 | 0.282 | 4.11e-02 | 0.0737 | 1.386 | ns | — Not significant |
| 86 | Keratin, type II cytoskeletal 6A | 19.89 | 21.724 | -1.834 | 0.2805 | 3.32e-01 | 0.3883 | 0.479 | ns | — Not significant |
| 87 | Keratin, type II cytoskeletal 78 | 17.296 | 19.516 | -2.22 | 0.2146 | 5.87e-02 | 0.0895 | 1.231 | ns | — Not significant |
| 88 | Keratin, type I cytoskeletal 17 | 18.433 | 21.217 | -2.7835 | 0.1452 | 1.19e-01 | 0.1595 | 0.925 | ns | — Not significant |
| 89 | Caspase-14 | 16.69 | 20.171 | -3.481 | 0.0896 | 5.04e-02 | 0.0841 | 1.297 | ns | — Not significant |
| 90 | Keratin, type II cytoskeletal 4 | 16.236 | 21.123 | -4.8875 | 0.0338 | 4.15e-02 | 0.0737 | 1.382 | ns | — Not significant |

**Supplementary Table S7: Sensitivity analysis of protein detection frequency and per-specimen detection rates across HSPM and MIH enamel.**

| **Gene** | **Protein Description** | **HSPM Detected (n/6)** | **HSPM Detection Freq (%)** | **MIH Detected (n/6)** | **MIH Detection Freq (%)** | **log₂FC (HSPM−MIH)** | **Selectivity Class** |
| --- | --- | --- | --- | --- | --- | --- | --- |
| **ALB** | **Albumin** | **6** | **100** | **6** | **100** | **0.527** | **Common (High Confidence)** |
| **MGP** | **Matrix Gla protein** | **6** | **100** | **6** | **100** | **4.332** | **Common (High Confidence)** |
| **SERPINF2** | **Alpha-2-antiplasmin** | **6** | **100** | **6** | **100** | **3.867** | **Common (High Confidence)** |
| **KRT78** | **Keratin, type II cytoskeletal 78** | **5** | **83.3** | **6** | **100** | **-3.166** | **Common (High Confidence)** |
| **COL17A1** | **Collagen alpha-1(XVII) chain** | **6** | **100** | **6** | **100** | **3.435** | **Common (High Confidence)** |
| **DSG1** | **Desmoglein-1** | **5** | **83.3** | **6** | **100** | **-3.202** | **Common (High Confidence)** |
| **PIP** | **Prolactin-inducible protein** | **6** | **100** | **6** | **100** | **0.826** | **Common (High Confidence)** |
| **SMR3B** | **Submaxillary gland androgen-regulated protein 3B** | **6** | **100** | **6** | **100** | **1.497** | **Common (High Confidence)** |
| **PSAP** | **Prosaposin** | **5** | **83.3** | **6** | **100** | **2.182** | **Common (High Confidence)** |
| **AZGP1** | **Zinc-alpha-2-glycoprotein** | **6** | **100** | **6** | **100** | **1.14** | **Common (High Confidence)** |
| **S100A7** | **Protein S100-A7** | **6** | **100** | **6** | **100** | **0.343** | **Common (High Confidence)** |
| **B2M** | **Beta-2-microglobulin** | **6** | **100** | **6** | **100** | **3.007** | **Common (High Confidence)** |
| **CLU** | **Clusterin** | **6** | **100** | **6** | **100** | **2.728** | **Common (High Confidence)** |
| **KLK4** | **Kallikrein-4** | **6** | **100** | **6** | **100** | **0.587** | **Common (High Confidence)** |
| **LYZ** | **Lysozyme C** | **6** | **100** | **6** | **100** | **2.571** | **Common (High Confidence)** |
| **DSPP** | **Dentin sialophosphoprotein** | **6** | **100** | **6** | **100** | **2.793** | **Common (High Confidence)** |
| **A2M** | **Alpha-2-macroglobulin** | **6** | **100** | **6** | **100** | **4.08** | **Common (High Confidence)** |
| **ACTB** | **Actin, cytoplasmic 1** | **6** | **100** | **6** | **100** | **-3.316** | **Common (High Confidence)** |
| **HRNR** | **Hornerin** | **6** | **100** | **6** | **100** | **-5.665** | **Common (High Confidence)** |
| **DCD** | **Dermcidin** | **6** | **100** | **6** | **100** | **-6.645** | **Common (High Confidence)** |
| **IGKV3-20** | **Immunoglobulin kappa variable 3-20** | **6** | **100** | **6** | **100** | **4.626** | **Common (High Confidence)** |
| **FLG** | **Filaggrin** | **6** | **100** | **6** | **100** | **-1.922** | **Common (High Confidence)** |
| **KPRP** | **Keratinocyte proline-rich protein** | **5** | **83.3** | **6** | **100** | **-4.956** | **Common (High Confidence)** |
| **LTBP3** | **Latent-transforming growth factor beta-binding protein 3** | **5** | **83.3** | **6** | **100** | **2.02** | **Common (High Confidence)** |
| **IGKV1-17** | **Immunoglobulin kappa variable 1-17** | **5** | **83.3** | **6** | **100** | **1.531** | **Common (High Confidence)** |
| **FGA** | **Fibrinogen alpha chain** | **5** | **83.3** | **6** | **100** | **-0.923** | **Common (High Confidence)** |
| **UBA52** | **Ubiquitin-60S ribosomal protein L40** | **6** | **100** | **6** | **100** | **-1.007** | **Common (High Confidence)** |
| **IGKV2-40** | **Immunoglobulin kappa variable 2-40** | **6** | **100** | **6** | **100** | **1.695** | **Common (High Confidence)** |
| **KRT73** | **Keratin, type II cytoskeletal 73** | **5** | **83.3** | **6** | **100** | **-1.721** | **Common (High Confidence)** |
| **LAMC2** | **Laminin subunit gamma-2** | **5** | **83.3** | **6** | **100** | **-0.427** | **Common (High Confidence)** |
| **IGLV3-21** | **Immunoglobulin lambda variable 3-21** | **6** | **100** | **6** | **100** | **3.117** | **Common (High Confidence)** |
| **IGKV1D-33** | **Immunoglobulin kappa variable 1D-33** | **6** | **100** | **6** | **100** | **1.285** | **Common (High Confidence)** |
| **H2AC20** | **Histone H2A type 2-C** | **5** | **83.3** | **6** | **100** | **-7.223** | **Common (High Confidence)** |
| **IGHV4-34** | **Immunoglobulin heavy variable 4-34** | **6** | **100** | **6** | **100** | **4.87** | **Common (High Confidence)** |
| **DEFA1** | **Neutrophil defensin 1** | **6** | **100** | **6** | **100** | **0.469** | **Common (High Confidence)** |
| **CORO1A** | **Coronin-1A** | **5** | **83.3** | **6** | **100** | **2.117** | **Common (High Confidence)** |
| **ANXA2** | **Annexin A2** | **6** | **100** | **6** | **100** | **-1.362** | **Common (High Confidence)** |
| **TGM3** | **Protein-glutamine gamma-glutamyltransferase E** | **5** | **83.3** | **6** | **100** | **-3.297** | **Common (High Confidence)** |
| **VTN** | **Vitronectin** | **6** | **100** | **6** | **100** | **5.835** | **Common (High Confidence)** |
| **AMBN** | **Ameloblastin** | **6** | **100** | **6** | **100** | **0.029** | **Common (High Confidence)** |
| **COL1A2** | **Collagen alpha-2(I) chain** | **6** | **100** | **6** | **100** | **2.841** | **Common (High Confidence)** |
| **SERPINB1** | **Leukocyte elastase inhibitor** | **6** | **100** | **6** | **100** | **2.251** | **Common (High Confidence)** |
| **C3** | **Complement C3** | **6** | **100** | **6** | **100** | **2.456** | **Common (High Confidence)** |
| **LTF** | **Lactotransferrin** | **5** | **83.3** | **6** | **100** | **3.027** | **Common (High Confidence)** |
| **S100A9** | **Protein S100-A9** | **6** | **100** | **6** | **100** | **4.977** | **Common (High Confidence)** |
| **KRT9** | **Keratin, type I cytoskeletal 9** | **6** | **100** | **6** | **100** | **-3.937** | **Common (High Confidence)** |
| **MMP20** | **Matrix metalloproteinase-20** | **6** | **100** | **6** | **100** | **5.397** | **Common (High Confidence)** |
| **KRT14** | **Keratin, type I cytoskeletal 14** | **6** | **100** | **6** | **100** | **-1.895** | **Common (High Confidence)** |
| **TTR** | **Transthyretin** | **6** | **100** | **6** | **100** | **3.969** | **Common (High Confidence)** |
| **KRT5** | **Keratin, type II cytoskeletal 5** | **6** | **100** | **6** | **100** | **-0.766** | **Common (High Confidence)** |
| **AMY1A** | **Alpha-amylase 1** | **6** | **100** | **6** | **100** | **2.041** | **Common (High Confidence)** |
| **SERPINA3** | **Alpha-1-antichymotrypsin** | **6** | **100** | **6** | **100** | **1.768** | **Common (High Confidence)** |
| **SERPINA1** | **Alpha-1-antitrypsin** | **6** | **100** | **6** | **100** | **3.471** | **Common (High Confidence)** |
| **SERPINC1** | **Antithrombin-III** | **6** | **100** | **6** | **100** | **2.584** | **Common (High Confidence)** |
| **KRT6A** | **Keratin, type II cytoskeletal 6A** | **6** | **100** | **6** | **100** | **-4.404** | **Common (High Confidence)** |
| **KRT6B** | **Keratin, type II cytoskeletal 6B** | **6** | **100** | **6** | **100** | **2.641** | **Common (High Confidence)** |
| **AHSG** | **Alpha-2-HS-glycoprotein** | **6** | **100** | **6** | **100** | **3.417** | **Common (High Confidence)** |
| **KRT16** | **Keratin, type I cytoskeletal 16** | **6** | **100** | **6** | **100** | **0.709** | **Common (High Confidence)** |
| **COL1A1** | **Collagen alpha-1(I) chain** | **6** | **100** | **6** | **100** | **6.549** | **Common (High Confidence)** |
| **HBB** | **Hemoglobin subunit beta** | **6** | **100** | **6** | **100** | **4.14** | **Common (High Confidence)** |
| **DSP** | **Desmoplakin** | **6** | **100** | **6** | **100** | **-3.26** | **Common (High Confidence)** |
| **F2** | **Prothrombin** | **6** | **100** | **6** | **100** | **2.398** | **Common (High Confidence)** |
| **ORM1** | **Alpha-1-acid glycoprotein 1** | **6** | **100** | **6** | **100** | **5.969** | **Common (High Confidence)** |
| **KRT10** | **Keratin, type I cytoskeletal 10** | **6** | **100** | **6** | **100** | **-1.8** | **Common (High Confidence)** |
| **COL11A2** | **Collagen alpha-2(XI) chain** | **6** | **100** | **6** | **100** | **4.6** | **Common (High Confidence)** |
| **IGLC2** | **Immunoglobulin lambda constant 2** | **6** | **100** | **6** | **100** | **1.764** | **Common (High Confidence)** |
| **VIM** | **Vimentin** | **6** | **100** | **6** | **100** | **-2.771** | **Common (High Confidence)** |
| **GC** | **Vitamin D-binding protein** | **6** | **100** | **6** | **100** | **4.406** | **Common (High Confidence)** |
| **KRT1** | **Keratin, type II cytoskeletal 1** | **6** | **100** | **6** | **100** | **-2.006** | **Common (High Confidence)** |
| **S100A8** | **Protein S100-A8** | **6** | **100** | **6** | **100** | **2.663** | **Common (High Confidence)** |
| **IGKC** | **Immunoglobulin kappa constant** | **6** | **100** | **6** | **100** | **2.634** | **Common (High Confidence)** |
| **HBA1** | **Hemoglobin subunit alpha** | **6** | **100** | **6** | **100** | **4.798** | **Common (High Confidence)** |
| **PCOLCE** | **Procollagen C-endopeptidase enhancer 1** | **6** | **100** | **6** | **100** | **3.657** | **Common (High Confidence)** |
| **KRT2** | **Keratin, type II cytoskeletal 2 epidermal** | **6** | **100** | **6** | **100** | **-1.406** | **Common (High Confidence)** |
| **APOA1** | **Apolipoprotein A-I** | **6** | **100** | **6** | **100** | **5.996** | **Common (High Confidence)** |
| **IGHG1** | **Immunoglobulin heavy constant gamma 1** | **6** | **100** | **6** | **100** | **3.48** | **Common (High Confidence)** |
| **SERPINF1** | **Pigment epithelium-derived factor** | **6** | **100** | **6** | **100** | **5.43** | **Common (High Confidence)** |
| **TF** | **Serotransferrin** | **6** | **100** | **6** | **100** | **3.132** | **Common (High Confidence)** |
| **OLFML3** | **Olfactomedin-like protein 3** | **3** | **50** | **6** | **100** | **1.7** | **Common (Moderate)** |
| **TXN** | **Thioredoxin** | **3** | **50** | **6** | **100** | **-3.645** | **Common (Moderate)** |
| **JUP** | **Junction plakoglobin** | **4** | **66.7** | **6** | **100** | **4.24** | **Common (Moderate)** |
| **IGHV3-43D** | **Immunoglobulin heavy variable 3-43D** | **4** | **66.7** | **6** | **100** | **0.483** | **Common (Moderate)** |
| **APOC3** | **Apolipoprotein C-III** | **4** | **66.7** | **6** | **100** | **4.348** | **Common (Moderate)** |
| **CASP14** | **Caspase-14** | **4** | **66.7** | **6** | **100** | **-6.002** | **Common (Moderate)** |
| **KRT4** | **Keratin, type II cytoskeletal 4** | **4** | **66.7** | **6** | **100** | **-9.911** | **Common (Moderate)** |
| **IGHG4** | **Immunoglobulin heavy constant gamma 4** | **4** | **66.7** | **6** | **100** | **4.919** | **Common (Moderate)** |
| **IGKV2D-24** | **Probable non-functional immunoglobulin kappa variable 2D-24** | **3** | **50** | **6** | **100** | **-1.648** | **Common (Moderate)** |
| **KRT17** | **Keratin, type I cytoskeletal 17** | **4** | **66.7** | **6** | **100** | **-1.95** | **Common (Moderate)** |
| **ANXA1** | **Annexin A1** | **3** | **50** | **6** | **100** | **-9.192** | **Common (Moderate)** |
| **IGHV1-69** | **Immunoglobulin heavy variable 1-69** | **4** | **66.7** | **6** | **100** | **-0.654** | **Common (Moderate)** |
